# Supplementary material for: Construction of a High-Density Genetic Linkage Map and QTL Mapping for Stem Rot Resistance in Passion Fruit (Passiflora edulis)
Source: Preprints.org preprint supplement (doi:10.20944/preprints202410.2200.v1), 2024-10-28
Supplement: Supplementary file 1 [file supplementary]

## Sheet: Sheet1
Supplementary Table 3 DEGs during three stages of Fusarium solani infection between HG and ZG7.
Gene id	A1 vs A2	B1 vs B2	C1 vs C2	Sum
ZX.01G0000070	no|up	yes|up	yes|up	2
ZX.01G0000090	yes|up	no|down	yes|down	2
ZX.01G0000100	no|down	yes|down	yes|down	2
ZX.01G0000110	yes|down	yes|down	yes|down	3
ZX.01G0000140	yes|down	yes|down	yes|down	3
ZX.01G0000150	no|down	yes|down	no|down	1
ZX.01G0000170	yes|up	no|down	no|up	1
ZX.01G0000210	no|up	yes|up	yes|up	2
ZX.01G0000230	yes|up	no|down	no|up	1
ZX.01G0000250	yes|up	yes|up	yes|up	3
ZX.01G0000260	yes|up	yes|up	yes|up	3
ZX.01G0000270	yes|up	yes|up	yes|up	3
ZX.01G0000290	yes|up	yes|up	yes|up	3
ZX.01G0000310	no|down	no|down	yes|down	1
ZX.01G0000330	no|down	yes|down	yes|down	2
ZX.01G0000580	no|down	yes|down	no|down	1
ZX.01G0000710	no|no test	yes|down	yes|down	2
ZX.01G0000740	no|up	yes|down	yes|down	2
ZX.01G0000790	yes|up	yes|up	yes|up	3
ZX.01G0000800	no|no test	yes|down	yes|down	2
ZX.01G0000820	yes|down	yes|down	yes|down	3
ZX.01G0000830	no|down	yes|down	yes|down	2
ZX.01G0000900	yes|down	yes|down	no|down	2
ZX.01G0000910	yes|down	no|down	no|down	1
ZX.01G0001000	no|up	yes|up	yes|up	2
ZX.01G0001040	yes|down	no|down	no|down	1
ZX.01G0001260	yes|down	no|no test	no|no test	1
ZX.01G0001290	yes|down	no|down	no|down	1
ZX.01G0001300	yes|down	yes|down	yes|down	3
ZX.01G0001530	yes|up	yes|up	yes|up	3
ZX.01G0001540	yes|up	yes|up	yes|up	3
ZX.01G0001680	no|down	no|down	yes|down	1
ZX.01G0001970	no|down	yes|down	no|up	1
ZX.01G0002140	no|no test	yes|up	no|up	1
ZX.01G0002240	no|up	yes|up	yes|up	2
ZX.01G0002340	yes|up	no|up	no|up	1
ZX.01G0002440	yes|down	no|down	no|down	1
ZX.01G0002530	no|up	no|down	yes|down	1
ZX.01G0002650	yes|up	yes|up	yes|up	3
ZX.01G0002760	no|up	yes|up	no|up	1
ZX.01G0002850	no|down	no|down	yes|down	1
ZX.01G0002910	yes|down	no|down	no|up	1
ZX.01G0002930	yes|up	yes|up	yes|up	3
ZX.01G0003010	yes|up	no|no test	no|no test	1
ZX.01G0003020	yes|up	no|up	no|up	1
ZX.01G0003050	yes|up	no|down	no|up	1
ZX.01G0003100	no|down	yes|up	no|up	1
ZX.01G0003170	no|down	yes|down	yes|down	2
ZX.01G0003240	yes|down	no|up	no|down	1
ZX.01G0003280	yes|up	no|up	yes|up	2
ZX.01G0003290	yes|down	no|down	no|up	1
ZX.01G0003300	no|up	yes|up	no|up	1
ZX.01G0003310	no|up	yes|down	no|down	1
ZX.01G0003410	no|up	no|down	yes|down	1
ZX.01G0003460	yes|up	no|down	no|down	1
ZX.01G0003500	yes|up	no|up	no|down	1
ZX.01G0003510	yes|up	no|down	no|down	1
ZX.01G0003540	no|down	yes|down	yes|down	2
ZX.01G0003550	yes|up	yes|up	yes|up	3
ZX.01G0003610	yes|up	yes|up	yes|up	3
ZX.01G0003630	no|up	no|up	yes|up	1
ZX.01G0003640	no|up	yes|up	yes|up	2
ZX.01G0003660	yes|up	yes|up	yes|up	3
ZX.01G0003690	no|up	no|up	yes|up	1
ZX.01G0003830	no|up	yes|up	no|up	1
ZX.01G0004020	no|up	no|up	yes|up	1
ZX.01G0004150	no|down	yes|down	yes|down	2
ZX.01G0004160	no|up	yes|up	no|up	1
ZX.01G0004210	no|down	yes|down	yes|down	2
ZX.01G0004270	yes|down	yes|down	yes|down	3
ZX.01G0004360	no|down	yes|up	yes|down	2
ZX.01G0004430	yes|down	no|up	no|up	1
ZX.01G0004460	no|down	no|down	yes|down	1
ZX.01G0004500	no|down	yes|down	yes|down	2
ZX.01G0004560	no|up	yes|up	no|up	1
ZX.01G0004630	no|up	yes|up	yes|up	2
ZX.01G0004780	no|up	yes|up	yes|up	2
ZX.01G0004790	no|no test	yes|up	yes|up	2
ZX.01G0004810	no|no test	yes|up	yes|up	2
ZX.01G0004820	no|down	no|up	yes|up	1
ZX.01G0004830	yes|up	yes|up	yes|up	3
ZX.01G0004850	no|up	yes|up	no|up	1
ZX.01G0004860	yes|up	no|up	no|up	1
ZX.01G0004870	yes|up	yes|up	yes|up	3
ZX.01G0004880	yes|up	yes|up	no|up	2
ZX.01G0004900	yes|up	no|up	no|up	1
ZX.01G0004950	yes|up	yes|up	yes|up	3
ZX.01G0005100	yes|up	yes|up	yes|up	3
ZX.01G0005120	no|down	no|down	yes|down	1
ZX.01G0005190	yes|down	no|down	no|down	1
ZX.01G0005230	yes|up	yes|up	yes|up	3
ZX.01G0005410	no|up	yes|up	no|up	1
ZX.01G0005430	yes|down	no|down	no|down	1
ZX.01G0005490	yes|down	no|down	no|down	1
ZX.01G0005520	yes|down	no|down	yes|down	2
ZX.01G0005530	no|down	yes|down	yes|down	2
ZX.01G0005540	yes|down	yes|down	yes|down	3
ZX.01G0005560	no|up	yes|down	no|down	1
ZX.01G0005610	yes|up	no|up	no|up	1
ZX.01G0005700	no|up	no|up	yes|up	1
ZX.01G0005730	yes|up	yes|up	yes|up	3
ZX.01G0005750	yes|up	no|up	yes|up	2
ZX.01G0005800	no|down	yes|up	no|up	1
ZX.01G0005840	yes|down	no|down	no|down	1
ZX.01G0005940	no|up	no|up	yes|up	1
ZX.01G0005970	yes|down	yes|down	no|down	2
ZX.01G0006010	no|down	no|down	yes|down	1
ZX.01G0006050	yes|up	yes|up	yes|up	3
ZX.01G0006120	no|down	no|down	yes|down	1
ZX.01G0006170	no|down	no|up	yes|up	1
ZX.01G0006220	yes|up	yes|up	yes|up	3
ZX.01G0006230	no|down	yes|up	no|up	1
ZX.01G0006290	yes|up	yes|up	yes|up	3
ZX.01G0006300	yes|up	yes|up	yes|up	3
ZX.01G0006340	yes|up	no|down	no|down	1
ZX.01G0006350	yes|up	yes|up	yes|up	3
ZX.01G0006360	yes|up	yes|up	yes|up	3
ZX.01G0006370	yes|up	yes|up	yes|up	3
ZX.01G0006390	no|down	no|down	yes|down	1
ZX.01G0006490	no|down	no|down	yes|down	1
ZX.01G0006500	yes|down	yes|down	yes|down	3
ZX.01G0006520	no|up	yes|down	no|down	1
ZX.01G0006590	no|down	no|up	yes|up	1
ZX.01G0006640	no|up	yes|up	yes|up	2
ZX.01G0006650	yes|down	no|up	no|up	1
ZX.01G0006690	yes|up	no|up	yes|up	2
ZX.01G0006700	yes|up	yes|up	no|up	2
ZX.01G0006710	yes|up	yes|up	yes|up	3
ZX.01G0006770	yes|up	no|up	no|up	1
ZX.01G0006780	no|up	yes|down	yes|down	2
ZX.01G0006830	yes|down	no|down	no|down	1
ZX.01G0006890	yes|up	no|down	no|up	1
ZX.01G0006910	no|down	yes|up	yes|up	2
ZX.01G0006960	no|up	no|up	yes|up	1
ZX.01G0007030	no|up	yes|up	yes|up	2
ZX.01G0007040	yes|up	yes|up	yes|up	3
ZX.01G0007050	yes|up	yes|up	yes|up	3
ZX.01G0007060	yes|up	no|down	yes|up	2
ZX.01G0007070	yes|up	yes|up	yes|up	3
ZX.01G0007080	yes|up	yes|up	yes|up	3
ZX.01G0007090	no|down	yes|down	yes|down	2
ZX.01G0007230	yes|up	yes|down	yes|down	3
ZX.01G0007270	yes|up	no|up	no|up	1
ZX.01G0007340	no|up	yes|down	yes|down	2
ZX.01G0007390	yes|up	yes|up	yes|up	3
ZX.01G0007400	yes|up	yes|up	yes|up	3
ZX.01G0007440	yes|up	yes|up	yes|up	3
ZX.01G0007450	yes|up	yes|up	yes|up	3
ZX.01G0007460	yes|up	yes|up	yes|up	3
ZX.01G0007490	yes|up	yes|up	no|up	2
ZX.01G0007510	no|down	yes|down	yes|down	2
ZX.01G0007520	yes|up	yes|up	yes|up	3
ZX.01G0007530	yes|up	yes|up	no|down	2
ZX.01G0007540	yes|up	yes|up	yes|up	3
ZX.01G0007550	yes|up	yes|up	no|up	2
ZX.01G0007590	yes|up	yes|up	no|up	2
ZX.01G0007610	no|down	no|down	yes|down	1
ZX.01G0007640	no|down	yes|down	yes|down	2
ZX.01G0007710	yes|up	no|up	no|up	1
ZX.01G0007730	no|down	yes|down	yes|down	2
ZX.01G0007790	yes|down	yes|down	yes|down	3
ZX.01G0007810	no|down	yes|down	no|down	1
ZX.01G0007920	yes|up	no|down	no|up	1
ZX.01G0007970	no|down	yes|down	no|down	1
ZX.01G0008000	yes|up	yes|up	yes|up	3
ZX.01G0008020	yes|up	yes|up	yes|up	3
ZX.01G0008060	yes|up	yes|up	yes|up	3
ZX.01G0008100	yes|up	yes|up	yes|up	3
ZX.01G0008150	yes|down	yes|down	yes|down	3
ZX.01G0008210	no|up	yes|up	no|up	1
ZX.01G0008240	yes|up	no|up	no|up	1
ZX.01G0008270	yes|up	yes|down	no|down	2
ZX.01G0008280	yes|up	yes|down	yes|down	3
ZX.01G0008290	yes|up	no|down	no|up	1
ZX.01G0008300	yes|up	no|down	no|down	1
ZX.01G0008310	yes|up	no|up	no|up	1
ZX.01G0008340	no|down	yes|down	yes|down	2
ZX.01G0008370	no|up	yes|up	no|up	1
ZX.01G0008440	yes|up	no|up	yes|up	2
ZX.01G0008460	yes|up	yes|down	yes|down	3
ZX.01G0008490	yes|up	yes|up	yes|up	3
ZX.01G0008510	no|up	yes|down	yes|down	2
ZX.01G0008540	no|up	yes|up	no|up	1
ZX.01G0008560	no|up	yes|up	yes|up	2
ZX.01G0008690	yes|up	no|up	no|up	1
ZX.01G0008730	no|up	no|up	yes|up	1
ZX.01G0008740	yes|down	no|down	no|down	1
ZX.01G0008750	yes|up	no|down	no|down	1
ZX.01G0008830	yes|up	yes|up	yes|up	3
ZX.01G0008870	yes|down	no|down	no|down	1
ZX.01G0008890	no|up	yes|down	yes|down	2
ZX.01G0008910	yes|up	no|up	no|down	1
ZX.01G0008930	no|down	yes|down	yes|down	2
ZX.01G0008970	no|up	yes|down	yes|down	2
ZX.01G0008980	no|up	no|down	yes|down	1
ZX.01G0009000	yes|up	yes|up	yes|up	3
ZX.01G0009020	yes|down	yes|down	yes|down	3
ZX.01G0009100	yes|up	no|up	no|down	1
ZX.01G0009130	no|down	no|down	yes|down	1
ZX.01G0009150	no|down	no|up	yes|up	1
ZX.01G0009200	no|down	no|down	yes|down	1
ZX.01G0009210	yes|down	no|down	no|down	1
ZX.01G0009240	no|up	yes|up	yes|up	2
ZX.01G0009250	yes|up	yes|up	yes|up	3
ZX.01G0009270	no|down	no|down	yes|down	1
ZX.01G0009280	yes|up	yes|up	yes|up	3
ZX.01G0009290	yes|up	yes|up	yes|up	3
ZX.01G0009320	yes|up	yes|up	yes|up	3
ZX.01G0009350	yes|down	no|down	yes|down	2
ZX.01G0009380	no|down	no|down	yes|down	1
ZX.01G0009420	no|up	yes|down	yes|down	2
ZX.01G0009440	yes|up	no|up	no|down	1
ZX.01G0009480	yes|down	yes|down	yes|down	3
ZX.01G0009530	no|down	no|down	yes|down	1
ZX.01G0009540	no|up	yes|down	yes|down	2
ZX.01G0009550	no|down	yes|down	yes|down	2
ZX.01G0009560	yes|down	yes|down	yes|down	3
ZX.01G0009640	yes|down	no|down	no|down	1
ZX.01G0009680	yes|down	yes|down	yes|down	3
ZX.01G0009700	yes|down	yes|down	yes|down	3
ZX.01G0009710	yes|down	yes|down	yes|down	3
ZX.01G0009740	no|down	yes|down	yes|down	2
ZX.01G0009790	yes|up	yes|up	yes|up	3
ZX.01G0009820	yes|up	no|up	yes|up	2
ZX.01G0009850	no|down	yes|down	yes|down	2
ZX.01G0009870	yes|up	yes|up	yes|up	3
ZX.01G0009880	yes|up	yes|up	yes|up	3
ZX.01G0009900	no|up	yes|up	no|up	1
ZX.01G0009910	yes|up	yes|up	yes|up	3
ZX.01G0009920	yes|up	yes|up	yes|up	3
ZX.01G0009940	yes|up	yes|up	yes|up	3
ZX.01G0009950	yes|up	yes|up	yes|up	3
ZX.01G0009960	yes|up	yes|up	yes|up	3
ZX.01G0009970	yes|up	yes|up	no|up	2
ZX.01G0009980	yes|up	yes|up	yes|up	3
ZX.01G0009990	no|up	yes|up	yes|up	2
ZX.01G0010000	yes|up	yes|up	yes|up	3
ZX.01G0010010	yes|up	yes|up	yes|up	3
ZX.01G0010020	no|down	yes|down	yes|down	2
ZX.01G0010050	yes|up	no|up	no|up	1
ZX.01G0010170	no|down	yes|down	yes|down	2
ZX.01G0010180	yes|up	yes|up	yes|up	3
ZX.01G0010220	yes|up	yes|up	yes|up	3
ZX.01G0010350	yes|up	no|up	no|up	1
ZX.01G0010360	yes|up	yes|up	yes|up	3
ZX.01G0010590	no|up	yes|up	yes|up	2
ZX.01G0010620	no|up	yes|up	no|up	1
ZX.01G0010640	yes|down	no|down	no|down	1
ZX.01G0010650	no|up	no|down	yes|down	1
ZX.01G0010670	yes|up	yes|up	yes|up	3
ZX.01G0010690	yes|up	yes|up	no|up	2
ZX.01G0010740	yes|up	no|down	no|down	1
ZX.01G0010790	no|up	yes|up	no|up	1
ZX.01G0010840	yes|down	yes|down	yes|down	3
ZX.01G0010900	yes|up	no|up	no|up	1
ZX.01G0011000	no|up	yes|up	no|up	1
ZX.01G0011020	no|down	yes|up	no|up	1
ZX.01G0011040	yes|up	no|down	no|up	1
ZX.01G0011070	no|up	yes|up	no|up	1
ZX.01G0011160	no|up	no|up	yes|up	1
ZX.01G0011190	yes|down	yes|down	yes|down	3
ZX.01G0011200	no|down	yes|down	no|down	1
ZX.01G0011220	yes|down	no|down	no|down	1
ZX.01G0011230	no|down	no|down	yes|down	1
ZX.01G0011250	yes|down	yes|down	yes|down	3
ZX.01G0011260	yes|up	yes|up	yes|up	3
ZX.01G0011280	yes|up	yes|up	no|up	2
ZX.01G0011380	no|up	yes|up	no|up	1
ZX.01G0011420	no|up	yes|down	yes|down	2
ZX.01G0011470	no|down	yes|up	yes|up	2
ZX.01G0011500	no|up	yes|up	yes|up	2
ZX.01G0011520	no|up	yes|up	yes|up	2
ZX.01G0011570	yes|up	no|up	no|up	1
ZX.01G0011580	yes|up	no|down	no|down	1
ZX.01G0011610	no|down	yes|up	yes|up	2
ZX.01G0011620	yes|up	yes|up	yes|up	3
ZX.01G0011630	yes|up	yes|up	yes|up	3
ZX.01G0011640	yes|up	yes|up	yes|up	3
ZX.01G0011670	no|up	yes|up	yes|up	2
ZX.01G0011700	no|down	no|down	yes|down	1
ZX.01G0011730	no|up	yes|down	no|down	1
ZX.01G0011760	yes|down	no|down	no|down	1
ZX.01G0011780	yes|down	yes|down	yes|down	3
ZX.01G0011790	no|up	yes|up	yes|up	2
ZX.01G0011820	no|down	yes|down	yes|down	2
ZX.01G0011900	no|up	yes|up	no|up	1
ZX.01G0011910	yes|up	no|up	no|down	1
ZX.01G0011920	yes|up	no|up	no|up	1
ZX.01G0012060	yes|up	no|down	no|down	1
ZX.01G0012070	yes|up	yes|up	yes|up	3
ZX.01G0012090	yes|up	yes|up	yes|up	3
ZX.01G0012110	no|up	no|up	yes|up	1
ZX.01G0012120	yes|up	yes|up	yes|up	3
ZX.01G0012280	no|down	no|down	yes|down	1
ZX.01G0012320	yes|up	yes|up	yes|up	3
ZX.01G0012350	no|down	yes|down	no|down	1
ZX.01G0012390	yes|down	no|down	no|down	1
ZX.01G0012470	yes|down	no|down	yes|down	2
ZX.01G0012500	yes|up	no|down	no|down	1
ZX.01G0012600	no|down	yes|down	no|down	1
ZX.01G0012620	no|up	yes|down	no|down	1
ZX.01G0012650	no|up	yes|down	no|down	1
ZX.01G0012690	no|up	yes|up	yes|up	2
ZX.01G0012720	no|up	yes|down	yes|down	2
ZX.01G0012750	no|up	yes|up	no|up	1
ZX.01G0012770	no|up	no|up	yes|down	1
ZX.01G0012970	yes|down	no|down	yes|down	2
ZX.01G0013110	yes|up	yes|up	no|up	2
ZX.01G0013200	no|up	no|up	yes|up	1
ZX.01G0013220	yes|down	yes|down	yes|down	3
ZX.01G0013230	yes|up	yes|up	yes|up	3
ZX.01G0013270	no|up	yes|up	no|up	1
ZX.01G0013310	no|up	yes|down	yes|down	2
ZX.01G0013320	no|up	yes|up	yes|up	2
ZX.01G0013360	yes|down	no|down	no|down	1
ZX.01G0013390	no|up	yes|up	yes|up	2
ZX.01G0013400	yes|down	yes|down	yes|down	3
ZX.01G0013410	no|up	yes|up	yes|up	2
ZX.01G0013460	no|up	yes|up	yes|up	2
ZX.01G0013480	no|up	yes|down	no|down	1
ZX.01G0013490	no|down	yes|down	yes|down	2
ZX.01G0013500	yes|up	no|down	no|up	1
ZX.01G0013520	yes|down	yes|down	yes|down	3
ZX.01G0013530	yes|down	yes|down	yes|down	3
ZX.01G0013540	yes|down	no|down	no|down	1
ZX.01G0013580	no|up	yes|up	yes|up	2
ZX.01G0013620	no|down	no|down	yes|down	1
ZX.01G0013700	yes|up	no|up	no|up	1
ZX.01G0013740	no|up	yes|up	yes|up	2
ZX.01G0013770	no|down	yes|down	yes|down	2
ZX.01G0013920	no|up	yes|up	yes|up	2
ZX.01G0013980	yes|up	no|up	no|up	1
ZX.01G0013990	no|up	yes|up	yes|up	2
ZX.01G0014020	no|up	no|up	yes|up	1
ZX.01G0014030	no|up	yes|up	yes|up	2
ZX.01G0014060	yes|down	no|down	no|down	1
ZX.01G0014090	no|up	no|down	yes|down	1
ZX.01G0014100	no|up	yes|down	yes|down	2
ZX.01G0014130	no|up	yes|up	no|up	1
ZX.01G0014190	yes|up	yes|down	yes|down	3
ZX.01G0014200	no|up	yes|down	yes|down	2
ZX.01G0014250	no|down	yes|up	yes|up	2
ZX.01G0014380	no|up	yes|up	no|up	1
ZX.01G0014510	no|up	yes|up	no|up	1
ZX.01G0014530	yes|down	no|down	no|up	1
ZX.01G0014600	no|down	yes|down	yes|down	2
ZX.01G0014670	no|up	yes|up	yes|up	2
ZX.01G0014720	no|down	no|up	yes|up	1
ZX.01G0014760	yes|up	no|up	no|up	1
ZX.01G0014770	yes|up	no|up	no|down	1
ZX.01G0014880	no|up	no|up	yes|up	1
ZX.01G0015000	no|down	yes|down	yes|down	2
ZX.01G0015010	no|down	yes|down	yes|down	2
ZX.01G0015030	yes|up	yes|up	yes|up	3
ZX.01G0015070	yes|up	yes|up	no|up	2
ZX.01G0015080	yes|up	yes|up	no|up	2
ZX.01G0015110	no|down	no|up	yes|up	1
ZX.01G0015350	yes|down	yes|down	no|down	2
ZX.01G0015410	no|down	yes|down	yes|down	2
ZX.01G0015490	yes|up	no|down	no|up	1
ZX.01G0015500	no|down	yes|down	yes|down	2
ZX.01G0015570	no|down	yes|down	yes|down	2
ZX.01G0015610	yes|down	yes|down	yes|down	3
ZX.01G0015630	no|down	yes|down	no|down	1
ZX.01G0015680	yes|up	no|up	no|down	1
ZX.01G0015760	no|up	no|up	yes|up	1
ZX.01G0015810	yes|up	yes|up	no|up	2
ZX.01G0015820	no|up	no|down	yes|down	1
ZX.01G0015880	no|down	yes|down	yes|down	2
ZX.01G0015890	no|up	yes|up	no|up	1
ZX.01G0015900	no|up	no|down	yes|down	1
ZX.01G0016000	yes|down	no|down	yes|down	2
ZX.01G0016070	yes|up	yes|up	yes|up	3
ZX.01G0016080	no|up	yes|up	yes|up	2
ZX.01G0016090	yes|up	yes|up	yes|up	3
ZX.01G0016110	yes|up	yes|up	yes|up	3
ZX.01G0016170	no|down	no|down	yes|down	1
ZX.01G0016230	yes|up	no|up	no|up	1
ZX.01G0016260	yes|down	no|down	no|down	1
ZX.01G0016360	no|up	yes|up	no|up	1
ZX.01G0016370	yes|up	yes|up	no|up	2
ZX.01G0016480	no|up	yes|down	yes|down	2
ZX.01G0016560	no|up	yes|down	no|down	1
ZX.01G0016610	yes|up	no|up	no|up	1
ZX.01G0016990	no|down	yes|down	no|down	1
ZX.01G0017120	yes|down	yes|down	yes|down	3
ZX.01G0017170	yes|up	no|down	no|down	1
ZX.01G0017200	yes|up	no|up	no|up	1
ZX.01G0017260	yes|up	yes|up	no|up	2
ZX.01G0017270	no|up	yes|up	yes|up	2
ZX.01G0017340	yes|down	no|up	no|up	1
ZX.01G0017360	yes|up	yes|up	yes|up	3
ZX.01G0017370	yes|up	yes|up	yes|up	3
ZX.01G0017380	yes|up	yes|up	yes|up	3
ZX.01G0017390	yes|up	no|up	no|up	1
ZX.01G0017410	yes|up	yes|up	yes|up	3
ZX.01G0017420	yes|up	yes|up	yes|up	3
ZX.01G0017440	yes|up	yes|up	no|up	2
ZX.01G0017450	yes|up	yes|up	yes|up	3
ZX.01G0017510	yes|up	yes|up	yes|up	3
ZX.01G0017530	no|down	no|down	yes|down	1
ZX.01G0017540	yes|up	no|up	no|up	1
ZX.01G0017590	yes|up	no|up	no|up	1
ZX.01G0017620	no|up	yes|up	yes|up	2
ZX.01G0017630	no|down	yes|down	yes|down	2
ZX.01G0017700	yes|down	yes|down	yes|down	3
ZX.01G0017730	yes|down	no|down	yes|down	2
ZX.01G0017750	no|down	yes|down	no|down	1
ZX.01G0017790	no|up	yes|up	yes|up	2
ZX.01G0017810	yes|down	yes|down	yes|down	3
ZX.01G0017830	yes|up	yes|up	yes|up	3
ZX.01G0017880	yes|up	no|up	no|up	1
ZX.01G0018050	no|up	no|up	yes|up	1
ZX.01G0018100	yes|up	no|down	no|down	1
ZX.01G0018170	no|up	yes|up	yes|up	2
ZX.01G0018190	no|down	no|down	yes|down	1
ZX.01G0018290	no|up	yes|up	no|up	1
ZX.01G0018330	no|down	yes|down	no|down	1
ZX.01G0018470	no|up	yes|up	no|up	1
ZX.01G0018480	no|up	yes|up	yes|up	2
ZX.01G0018540	no|up	yes|up	no|up	1
ZX.01G0018820	yes|up	yes|up	yes|up	3
ZX.01G0018940	yes|up	no|up	no|up	1
ZX.01G0018990	yes|down	yes|down	yes|down	3
ZX.01G0019000	yes|down	yes|down	yes|down	3
ZX.01G0019070	yes|up	yes|up	no|up	2
ZX.01G0019100	no|up	yes|up	no|up	1
ZX.01G0019170	no|up	no|up	yes|up	1
ZX.01G0019190	no|down	yes|down	yes|down	2
ZX.01G0019220	no|up	no|up	yes|up	1
ZX.01G0019240	yes|down	yes|down	yes|down	3
ZX.01G0019260	yes|down	no|up	no|up	1
ZX.01G0019270	no|down	yes|down	yes|down	2
ZX.01G0019360	yes|up	yes|up	no|up	2
ZX.01G0019470	yes|up	yes|up	yes|up	3
ZX.01G0019480	no|up	yes|down	yes|down	2
ZX.01G0019700	yes|up	yes|up	yes|up	3
ZX.01G0019780	yes|up	no|up	yes|up	2
ZX.01G0019800	yes|up	yes|up	yes|up	3
ZX.01G0019820	yes|up	no|down	no|down	1
ZX.01G0019840	yes|down	no|down	no|down	1
ZX.01G0019940	no|up	yes|up	yes|up	2
ZX.01G0020000	yes|up	no|up	no|up	1
ZX.01G0020280	no|down	yes|up	yes|up	2
ZX.01G0020370	yes|up	no|no test	no|no test	1
ZX.01G0020400	yes|down	yes|down	yes|down	3
ZX.01G0020450	yes|up	yes|up	yes|up	3
ZX.01G0020470	no|down	yes|up	yes|up	2
ZX.01G0020500	no|up	yes|up	no|up	1
ZX.01G0020540	no|up	yes|up	yes|up	2
ZX.01G0020650	yes|down	yes|down	yes|down	3
ZX.01G0020740	no|up	yes|down	no|down	1
ZX.01G0020960	yes|up	no|up	no|up	1
ZX.01G0021090	yes|up	yes|up	yes|up	3
ZX.01G0021130	yes|up	yes|up	yes|up	3
ZX.01G0021160	no|up	yes|up	no|up	1
ZX.01G0021220	no|up	yes|up	no|up	1
ZX.01G0021230	yes|up	yes|up	yes|up	3
ZX.01G0021250	yes|up	yes|up	yes|up	3
ZX.01G0021260	yes|up	yes|up	yes|up	3
ZX.01G0021270	yes|up	yes|up	yes|up	3
ZX.01G0021280	yes|up	yes|up	yes|up	3
ZX.01G0021340	yes|down	no|down	no|up	1
ZX.01G0021350	no|down	yes|down	no|down	1
ZX.01G0021390	yes|down	yes|down	yes|down	3
ZX.01G0021400	yes|down	no|down	yes|down	2
ZX.01G0021420	yes|up	yes|up	no|up	2
ZX.01G0021430	no|up	no|up	yes|down	1
ZX.01G0021470	yes|up	yes|up	yes|up	3
ZX.01G0021490	yes|up	yes|up	yes|up	3
ZX.01G0021700	no|up	yes|down	yes|down	2
ZX.01G0021720	no|up	yes|up	no|up	1
ZX.01G0021850	yes|down	no|up	no|down	1
ZX.01G0021860	yes|up	yes|up	yes|up	3
ZX.01G0021880	no|up	yes|up	yes|up	2
ZX.01G0021890	no|down	yes|down	yes|down	2
ZX.01G0021980	no|up	yes|up	no|up	1
ZX.01G0021990	no|up	yes|up	yes|up	2
ZX.01G0022000	no|no test	no|down	yes|down	1
ZX.01G0022050	no|down	yes|down	no|up	1
ZX.01G0022120	no|up	yes|up	no|up	1
ZX.01G0022240	no|up	yes|up	no|up	1
ZX.01G0022300	no|up	yes|up	yes|up	2
ZX.01G0022310	yes|down	yes|up	yes|up	3
ZX.01G0022320	yes|up	yes|up	yes|up	3
ZX.01G0022330	yes|up	yes|up	yes|up	3
ZX.01G0022360	yes|down	yes|down	no|down	2
ZX.01G0022370	yes|down	no|down	no|down	1
ZX.01G0022380	yes|down	no|down	no|down	1
ZX.01G0022390	yes|down	no|down	no|down	1
ZX.01G0022410	yes|down	yes|down	yes|down	3
ZX.01G0022430	yes|up	no|up	no|up	1
ZX.01G0022490	yes|up	yes|up	no|up	2
ZX.01G0022540	yes|up	no|up	no|up	1
ZX.01G0022570	no|down	yes|down	yes|down	2
ZX.01G0022580	yes|up	no|up	yes|up	2
ZX.01G0022590	yes|up	no|down	no|up	1
ZX.01G0022610	yes|up	yes|up	yes|up	3
ZX.01G0022620	yes|up	yes|up	yes|up	3
ZX.01G0022660	yes|up	no|up	no|up	1
ZX.01G0022690	yes|up	yes|up	no|up	2
ZX.01G0022730	no|up	yes|up	yes|up	2
ZX.01G0022810	no|down	yes|down	no|up	1
ZX.01G0022870	yes|down	no|down	no|down	1
ZX.01G0022920	no|down	yes|up	yes|up	2
ZX.01G0023000	yes|up	yes|up	no|up	2
ZX.01G0023020	yes|down	yes|down	no|down	2
ZX.01G0023030	yes|up	no|up	no|down	1
ZX.01G0023050	no|up	yes|down	no|down	1
ZX.01G0023070	no|up	yes|up	yes|up	2
ZX.01G0023100	no|up	yes|down	no|down	1
ZX.01G0023110	no|down	yes|down	no|down	1
ZX.01G0023160	yes|up	yes|up	yes|up	3
ZX.01G0023190	yes|up	yes|up	yes|up	3
ZX.01G0023200	yes|up	yes|up	yes|up	3
ZX.01G0023220	yes|up	yes|up	yes|up	3
ZX.01G0023230	yes|up	yes|up	yes|up	3
ZX.01G0023240	yes|up	yes|up	yes|up	3
ZX.01G0023320	yes|up	no|down	no|up	1
ZX.01G0023340	yes|up	yes|up	no|up	2
ZX.01G0023380	yes|up	no|down	no|down	1
ZX.01G0023480	no|up	yes|up	no|up	1
ZX.01G0023520	yes|down	yes|down	no|down	2
ZX.01G0023530	yes|down	yes|down	yes|down	3
ZX.01G0023550	no|down	yes|down	yes|down	2
ZX.01G0023580	yes|down	yes|down	yes|down	3
ZX.01G0023680	yes|up	no|up	no|up	1
ZX.01G0023690	no|up	no|up	yes|up	1
ZX.01G0023740	no|up	no|up	yes|up	1
ZX.01G0023770	no|up	yes|down	yes|down	2
ZX.01G0023780	yes|up	yes|up	yes|up	3
ZX.01G0023810	no|up	no|up	yes|up	1
ZX.01G0023990	yes|down	yes|up	no|up	2
ZX.01G0024000	yes|down	no|up	no|up	1
ZX.01G0024020	yes|up	yes|up	yes|up	3
ZX.01G0024050	yes|up	no|up	no|up	1
ZX.01G0024070	yes|up	yes|up	no|up	2
ZX.01G0024080	yes|down	no|down	yes|up	2
ZX.01G0024090	no|up	no|up	yes|up	1
ZX.01G0024120	no|down	yes|down	yes|down	2
ZX.01G0024150	yes|up	no|down	no|down	1
ZX.01G0024170	yes|up	no|up	no|up	1
ZX.01G0024180	no|up	yes|up	no|up	1
ZX.01G0024250	no|down	yes|up	yes|up	2
ZX.01G0024260	no|up	no|up	yes|up	1
ZX.01G0024290	yes|up	yes|up	yes|up	3
ZX.01G0024360	no|up	yes|up	no|up	1
ZX.01G0024370	no|up	yes|down	yes|down	2
ZX.01G0024430	no|up	yes|up	no|up	1
ZX.01G0024470	yes|up	no|up	yes|up	2
ZX.01G0024520	no|up	no|down	yes|down	1
ZX.01G0024530	no|down	no|down	yes|down	1
ZX.01G0024640	yes|down	no|down	no|down	1
ZX.01G0024770	no|down	yes|up	no|down	1
ZX.01G0024950	yes|down	yes|down	yes|down	3
ZX.01G0024980	no|up	no|up	yes|up	1
ZX.01G0024990	yes|up	no|up	no|up	1
ZX.01G0025060	no|down	yes|down	yes|down	2
ZX.01G0025270	yes|up	yes|up	no|up	2
ZX.01G0025310	yes|up	no|up	no|up	1
ZX.01G0025350	yes|up	no|up	no|up	1
ZX.01G0025360	no|down	yes|down	yes|down	2
ZX.01G0025430	no|down	yes|down	yes|down	2
ZX.01G0025450	no|down	yes|down	yes|down	2
ZX.01G0025470	no|down	yes|down	yes|down	2
ZX.01G0025610	no|down	yes|down	yes|down	2
ZX.01G0025620	no|down	yes|down	yes|down	2
ZX.01G0025650	yes|up	yes|up	yes|up	3
ZX.01G0025840	no|down	no|up	yes|up	1
ZX.01G0025870	no|up	yes|down	no|down	1
ZX.01G0025980	no|down	no|up	yes|up	1
ZX.01G0026020	yes|down	no|up	no|up	1
ZX.01G0026260	no|down	no|down	yes|down	1
ZX.01G0026320	no|down	no|up	yes|up	1
ZX.01G0026390	yes|up	yes|up	yes|up	3
ZX.01G0026510	yes|up	no|down	no|down	1
ZX.01G0026550	no|up	no|up	yes|up	1
ZX.01G0026580	no|up	no|up	yes|up	1
ZX.01G0026590	yes|down	yes|down	yes|down	3
ZX.01G0026610	no|up	yes|up	no|up	1
ZX.01G0026740	no|up	yes|up	yes|up	2
ZX.01G0026760	no|up	yes|up	yes|up	2
ZX.01G0026800	yes|up	yes|up	yes|up	3
ZX.01G0026860	yes|down	yes|down	no|down	2
ZX.01G0026870	yes|up	no|up	yes|up	2
ZX.01G0026930	no|down	yes|up	yes|up	2
ZX.01G0027010	no|up	yes|down	yes|down	2
ZX.01G0027030	no|up	yes|up	yes|up	2
ZX.01G0027050	yes|down	yes|down	yes|down	3
ZX.01G0027090	no|up	yes|up	no|up	1
ZX.01G0027110	yes|up	yes|up	no|up	2
ZX.01G0027150	yes|up	no|up	yes|up	2
ZX.01G0027160	yes|up	yes|up	yes|up	3
ZX.01G0027180	no|down	yes|down	no|down	1
ZX.01G0027200	no|up	yes|up	yes|up	2
ZX.01G0027310	no|up	yes|up	no|up	1
ZX.01G0027340	yes|up	no|up	no|no test	1
ZX.01G0027370	no|up	yes|down	no|down	1
ZX.01G0027410	yes|up	no|up	no|up	1
ZX.01G0027480	yes|up	no|up	no|up	1
ZX.01G0027550	no|up	yes|down	no|down	1
ZX.01G0027570	yes|up	no|down	no|down	1
ZX.01G0027640	no|up	yes|up	no|up	1
ZX.01G0027750	no|up	no|up	yes|up	1
ZX.01G0027850	yes|up	no|up	no|up	1
ZX.01G0028020	no|down	yes|down	yes|down	2
ZX.01G0028100	yes|up	yes|up	yes|up	3
ZX.01G0028120	yes|down	no|down	no|down	1
ZX.01G0028280	yes|up	yes|up	yes|up	3
ZX.01G0028300	no|down	yes|down	no|down	1
ZX.01G0028350	yes|up	yes|up	yes|up	3
ZX.01G0028400	yes|up	yes|up	no|up	2
ZX.01G0028450	no|down	no|down	yes|down	1
ZX.01G0028520	yes|up	yes|up	yes|up	3
ZX.01G0028600	yes|up	no|up	no|up	1
ZX.01G0028620	yes|down	no|down	no|down	1
ZX.01G0028690	yes|up	no|down	no|down	1
ZX.01G0028770	no|up	yes|down	no|down	1
ZX.01G0028820	no|up	no|down	yes|down	1
ZX.01G0028840	no|up	yes|up	yes|up	2
ZX.01G0028850	no|down	yes|down	no|down	1
ZX.01G0028870	no|up	yes|up	no|up	1
ZX.01G0028920	no|down	no|up	yes|up	1
ZX.01G0028950	yes|up	no|up	no|up	1
ZX.01G0028960	yes|up	no|down	no|down	1
ZX.01G0029040	no|down	yes|down	yes|down	2
ZX.01G0029090	yes|up	yes|up	no|up	2
ZX.01G0029160	yes|up	no|up	no|up	1
ZX.01G0029170	yes|up	no|up	no|up	1
ZX.01G0029190	no|up	yes|down	yes|down	2
ZX.01G0029200	no|down	yes|down	yes|down	2
ZX.01G0029260	yes|up	no|up	no|up	1
ZX.01G0029270	no|down	no|down	yes|down	1
ZX.01G0029280	no|up	no|down	yes|down	1
ZX.01G0029360	yes|down	yes|down	no|down	2
ZX.01G0029450	yes|up	yes|up	yes|up	3
ZX.01G0029500	no|down	no|up	yes|up	1
ZX.01G0029520	no|down	yes|down	no|down	1
ZX.01G0029550	yes|up	no|down	no|down	1
ZX.01G0029580	yes|up	no|up	no|up	1
ZX.01G0029660	yes|down	yes|down	yes|down	3
ZX.01G0029710	yes|up	no|down	no|down	1
ZX.01G0029730	yes|up	no|down	no|up	1
ZX.01G0029770	yes|up	no|up	yes|up	2
ZX.01G0029820	no|down	yes|down	yes|down	2
ZX.01G0029840	no|down	yes|down	no|down	1
ZX.01G0029880	no|up	yes|up	no|up	1
ZX.01G0029930	yes|up	no|down	no|up	1
ZX.01G0029950	no|down	yes|down	yes|down	2
ZX.01G0030070	no|up	yes|up	no|up	1
ZX.01G0030120	no|down	yes|down	yes|down	2
ZX.01G0030160	no|down	no|down	yes|down	1
ZX.01G0030190	yes|up	yes|up	yes|up	3
ZX.01G0030230	no|up	yes|down	no|down	1
ZX.01G0030270	yes|down	no|down	no|down	1
ZX.01G0030340	yes|up	yes|up	yes|up	3
ZX.01G0030400	yes|up	no|up	no|up	1
ZX.01G0030440	no|down	yes|down	yes|down	2
ZX.01G0030530	yes|up	yes|up	no|up	2
ZX.01G0030670	no|down	yes|down	yes|down	2
ZX.01G0030730	yes|up	no|up	no|up	1
ZX.01G0030740	yes|up	yes|up	no|up	2
ZX.01G0030750	no|up	no|up	yes|up	1
ZX.01G0030820	no|up	no|up	yes|up	1
ZX.01G0030870	no|up	no|down	yes|down	1
ZX.01G0030890	yes|up	no|up	no|up	1
ZX.01G0030900	yes|down	yes|down	yes|down	3
ZX.01G0030940	no|up	no|up	yes|up	1
ZX.01G0030970	yes|down	no|up	no|up	1
ZX.01G0031000	yes|up	no|no test	no|down	1
ZX.01G0031010	no|down	yes|down	no|down	1
ZX.01G0031020	no|up	yes|up	yes|up	2
ZX.01G0031030	no|up	yes|up	yes|up	2
ZX.01G0031040	no|up	yes|up	yes|up	2
ZX.01G0031190	yes|down	no|down	no|down	1
ZX.01G0031230	yes|up	no|up	no|up	1
ZX.01G0031250	yes|down	no|down	yes|down	2
ZX.01G0031300	no|down	yes|down	yes|down	2
ZX.01G0031320	yes|down	yes|down	yes|down	3
ZX.01G0031450	no|up	yes|up	yes|up	2
ZX.01G0031460	no|up	no|down	yes|down	1
ZX.01G0031470	yes|up	no|up	no|up	1
ZX.01G0031500	yes|up	no|down	no|down	1
ZX.01G0031540	no|down	yes|down	yes|down	2
ZX.01G0031600	yes|up	no|up	no|up	1
ZX.01G0031630	no|up	yes|up	yes|up	2
ZX.01G0031640	yes|up	yes|up	yes|up	3
ZX.01G0031650	no|up	yes|down	no|down	1
ZX.01G0031660	no|up	yes|up	yes|up	2
ZX.01G0031680	no|up	yes|up	no|up	1
ZX.01G0031690	no|down	yes|down	yes|down	2
ZX.01G0031780	yes|down	yes|down	yes|down	3
ZX.01G0031800	yes|down	yes|down	yes|down	3
ZX.01G0031810	yes|down	yes|down	yes|down	3
ZX.01G0031820	yes|up	yes|up	yes|up	3
ZX.01G0031850	no|up	no|up	yes|up	1
ZX.01G0031870	no|up	yes|up	yes|up	2
ZX.01G0031880	yes|up	yes|up	yes|up	3
ZX.01G0031950	no|up	yes|up	no|up	1
ZX.01G0032060	yes|up	no|up	no|up	1
ZX.01G0032080	no|up	yes|up	yes|up	2
ZX.01G0032120	no|up	yes|up	yes|up	2
ZX.01G0032170	yes|up	yes|up	yes|up	3
ZX.01G0032180	yes|down	yes|down	yes|down	3
ZX.01G0032210	yes|down	yes|down	yes|down	3
ZX.01G0032290	yes|up	yes|up	yes|up	3
ZX.01G0032330	yes|up	yes|up	yes|up	3
ZX.01G0032360	yes|down	no|down	no|down	1
ZX.01G0032410	yes|down	no|up	no|up	1
ZX.01G0032440	yes|up	no|up	yes|up	2
ZX.01G0032460	no|up	yes|down	no|down	1
ZX.01G0032510	yes|up	yes|up	no|up	2
ZX.01G0032530	yes|up	no|up	no|up	1
ZX.01G0032540	yes|up	no|up	no|up	1
ZX.01G0032590	yes|up	no|up	no|up	1
ZX.01G0032600	no|up	yes|down	yes|down	2
ZX.01G0032610	yes|up	no|up	yes|up	2
ZX.01G0032620	no|down	yes|up	no|up	1
ZX.01G0032640	no|down	yes|up	yes|up	2
ZX.01G0032650	yes|up	yes|up	yes|up	3
ZX.01G0032660	yes|down	no|down	no|down	1
ZX.01G0032670	yes|up	yes|up	yes|up	3
ZX.01G0032750	no|down	yes|down	yes|down	2
ZX.01G0032790	yes|up	no|up	no|up	1
ZX.01G0032800	yes|up	no|up	no|up	1
ZX.01G0032820	no|down	no|up	yes|up	1
ZX.01G0032850	yes|up	no|up	no|up	1
ZX.01G0032880	yes|up	no|down	no|up	1
ZX.01G0032930	yes|down	no|down	no|down	1
ZX.01G0032990	no|up	no|down	yes|down	1
ZX.01G0033000	yes|up	no|up	no|down	1
ZX.01G0033050	yes|up	yes|up	yes|up	3
ZX.01G0033060	no|down	yes|down	yes|down	2
ZX.01G0033090	yes|down	yes|down	yes|down	3
ZX.01G0033100	no|down	yes|down	yes|down	2
ZX.01G0033130	yes|up	yes|up	yes|up	3
ZX.01G0033150	yes|up	no|up	no|up	1
ZX.01G0033270	yes|up	no|up	no|up	1
ZX.01G0033320	no|up	yes|up	no|up	1
ZX.01G0033330	no|down	yes|down	yes|down	2
ZX.01G0033340	yes|down	yes|down	yes|down	3
ZX.01G0033350	yes|up	no|down	no|down	1
ZX.01G0033360	no|down	yes|down	yes|down	2
ZX.01G0033370	yes|up	no|up	no|up	1
ZX.01G0033420	no|down	yes|down	no|down	1
ZX.01G0033440	yes|up	yes|up	yes|up	3
ZX.01G0033450	yes|down	no|down	no|down	1
ZX.01G0033460	no|up	yes|up	yes|up	2
ZX.01G0033480	yes|up	no|up	no|up	1
ZX.01G0033500	no|up	yes|up	no|up	1
ZX.01G0033530	yes|down	no|up	no|up	1
ZX.01G0033580	yes|down	yes|down	yes|down	3
ZX.01G0033650	yes|up	no|up	no|down	1
ZX.01G0033690	yes|down	yes|down	yes|down	3
ZX.01G0033700	no|up	yes|up	no|up	1
ZX.01G0033720	no|up	yes|up	yes|up	2
ZX.01G0033740	yes|up	no|up	no|up	1
ZX.01G0033780	yes|down	no|up	yes|up	2
ZX.01G0033800	yes|down	yes|down	yes|down	3
ZX.01G0033850	no|up	yes|up	no|down	1
ZX.01G0033860	no|up	yes|down	no|down	1
ZX.01G0033880	yes|down	yes|down	yes|down	3
ZX.01G0033920	yes|up	yes|up	yes|up	3
ZX.01G0033960	yes|down	no|down	no|down	1
ZX.01G0033970	yes|down	no|no test	no|no test	1
ZX.01G0034060	yes|down	yes|down	yes|down	3
ZX.01G0034070	no|up	no|down	yes|down	1
ZX.01G0034110	yes|down	yes|down	yes|down	3
ZX.01G0034120	no|up	yes|up	yes|up	2
ZX.01G0034130	yes|up	no|up	no|up	1
ZX.01G0034150	no|up	yes|up	yes|up	2
ZX.01G0034160	yes|up	yes|up	yes|up	3
ZX.01G0034170	yes|up	yes|up	yes|up	3
ZX.01G0034200	yes|up	no|up	no|up	1
ZX.01G0034210	yes|up	yes|up	yes|up	3
ZX.01G0034220	no|down	yes|down	yes|down	2
ZX.01G0034230	yes|up	yes|up	yes|up	3
ZX.01G0034240	no|up	no|up	yes|up	1
ZX.01G0034270	yes|up	yes|up	yes|up	3
ZX.01G0034290	no|down	yes|down	yes|down	2
ZX.01G0034310	no|up	yes|up	yes|up	2
ZX.01G0034340	yes|up	yes|up	yes|up	3
ZX.01G0034360	no|down	no|down	yes|down	1
ZX.01G0034370	yes|down	yes|down	no|up	2
ZX.01G0034390	yes|up	yes|up	yes|up	3
ZX.01G0034450	yes|up	yes|up	no|up	2
ZX.01G0034500	yes|up	yes|up	yes|up	3
ZX.01G0034510	no|down	yes|down	yes|down	2
ZX.01G0034590	no|up	yes|up	yes|up	2
ZX.01G0034610	no|down	no|down	yes|down	1
ZX.01G0034620	yes|down	yes|down	yes|down	3
ZX.01G0034640	no|down	yes|down	no|down	1
ZX.01G0034650	no|up	yes|up	yes|up	2
ZX.01G0034660	no|down	yes|up	yes|up	2
ZX.01G0034670	no|down	yes|up	yes|up	2
ZX.01G0034680	no|down	yes|up	yes|up	2
ZX.01G0034690	yes|up	no|down	no|down	1
ZX.01G0034730	yes|up	no|up	no|up	1
ZX.01G0034780	no|down	yes|up	no|up	1
ZX.01G0034790	yes|down	no|up	no|up	1
ZX.01G0034820	yes|up	yes|up	yes|up	3
ZX.01G0034830	yes|up	no|up	no|up	1
ZX.01G0034850	yes|up	yes|up	no|up	2
ZX.01G0034870	no|down	no|down	yes|down	1
ZX.01G0034880	yes|down	no|down	no|down	1
ZX.01G0034890	yes|up	yes|up	yes|up	3
ZX.01G0034900	no|up	yes|up	yes|up	2
ZX.01G0034920	no|no test	no|down	yes|down	1
ZX.01G0034980	no|down	no|down	yes|down	1
ZX.01G0035010	no|up	yes|up	no|up	1
ZX.01G0035040	yes|up	no|up	no|up	1
ZX.01G0035050	no|up	yes|down	no|up	1
ZX.01G0035140	yes|down	no|no test	no|down	1
ZX.01G0035170	no|down	yes|down	yes|down	2
ZX.01G0035180	no|up	yes|up	no|up	1
ZX.01G0035200	no|up	yes|up	yes|up	2
ZX.01G0035220	yes|up	yes|up	no|up	2
ZX.01G0035290	yes|up	no|down	no|down	1
ZX.01G0035390	no|up	yes|down	no|down	1
ZX.01G0035410	yes|up	yes|up	yes|up	3
ZX.01G0035450	yes|up	yes|up	yes|up	3
ZX.01G0035460	yes|up	yes|up	yes|up	3
ZX.01G0035480	yes|up	yes|up	yes|up	3
ZX.01G0035520	yes|up	no|up	no|up	1
ZX.01G0035550	yes|up	no|down	no|down	1
ZX.01G0035570	no|down	yes|down	no|down	1
ZX.01G0035580	yes|down	yes|down	yes|down	3
ZX.01G0035590	yes|up	no|up	yes|up	2
ZX.01G0035610	yes|up	no|up	no|up	1
ZX.01G0035620	yes|up	no|no test	no|no test	1
ZX.01G0035720	yes|up	yes|up	yes|up	3
ZX.01G0035750	no|down	yes|down	yes|down	2
ZX.01G0035770	no|up	yes|down	yes|down	2
ZX.01G0035790	yes|down	yes|down	yes|down	3
ZX.01G0035820	no|up	no|down	yes|down	1
ZX.01G0035830	no|up	yes|down	yes|down	2
ZX.01G0035850	yes|up	yes|down	no|down	2
ZX.01G0035960	yes|up	no|down	no|down	1
ZX.01G0035990	yes|down	yes|down	yes|down	3
ZX.01G0036000	yes|down	no|down	no|down	1
ZX.01G0036020	yes|up	yes|up	yes|up	3
ZX.01G0036090	yes|up	no|up	no|up	1
ZX.01G0036140	yes|down	yes|down	no|down	2
ZX.01G0036150	no|down	no|down	yes|down	1
ZX.01G0036200	yes|up	yes|up	no|up	2
ZX.01G0036210	no|up	yes|down	no|down	1
ZX.01G0036250	yes|up	yes|up	yes|up	3
ZX.01G0036260	yes|down	no|down	yes|down	2
ZX.01G0036270	yes|up	no|down	no|up	1
ZX.01G0036280	yes|down	no|down	yes|down	2
ZX.01G0036290	no|up	yes|up	no|up	1
ZX.01G0036440	no|up	yes|up	yes|up	2
ZX.01G0036450	no|down	yes|down	yes|down	2
ZX.01G0036470	yes|up	yes|up	yes|up	3
ZX.01G0036490	yes|up	yes|up	yes|up	3
ZX.01G0036500	yes|up	yes|up	yes|up	3
ZX.01G0036510	yes|up	yes|up	yes|up	3
ZX.01G0036520	no|down	yes|down	yes|down	2
ZX.01G0036530	no|down	yes|down	yes|down	2
ZX.01G0036650	no|up	yes|down	yes|down	2
ZX.01G0036660	no|up	yes|up	no|down	1
ZX.01G0036670	yes|up	no|up	no|down	1
ZX.01G0036820	no|up	no|down	yes|down	1
ZX.01G0037000	no|down	yes|down	yes|down	2
ZX.01G0037010	no|down	no|down	yes|down	1
ZX.01G0037050	no|up	yes|up	yes|up	2
ZX.01G0037350	no|down	no|down	yes|down	1
ZX.01G0037370	yes|up	yes|up	yes|up	3
ZX.01G0037380	yes|up	no|up	no|down	1
ZX.01G0037390	no|down	yes|down	yes|down	2
ZX.01G0037430	yes|up	no|up	no|up	1
ZX.01G0037450	no|down	yes|down	yes|down	2
ZX.01G0037480	yes|up	no|up	no|up	1
ZX.01G0037590	no|up	yes|down	yes|down	2
ZX.01G0037670	no|down	no|down	yes|down	1
ZX.01G0037720	yes|up	yes|up	yes|up	3
ZX.01G0037740	no|up	yes|up	yes|up	2
ZX.01G0037750	yes|up	yes|up	yes|up	3
ZX.01G0037790	yes|up	yes|up	yes|up	3
ZX.01G0037800	yes|up	yes|up	yes|up	3
ZX.01G0037810	no|up	yes|up	no|up	1
ZX.01G0037820	yes|up	no|up	no|up	1
ZX.01G0037890	no|up	yes|up	no|up	1
ZX.01G0037970	yes|up	no|up	yes|up	2
ZX.01G0038100	yes|up	no|up	no|up	1
ZX.01G0038120	no|down	no|down	yes|down	1
ZX.01G0038170	no|up	yes|down	yes|down	2
ZX.01G0038280	no|up	yes|up	yes|up	2
ZX.01G0038370	no|down	no|down	yes|down	1
ZX.01G0038440	yes|up	no|down	no|down	1
ZX.01G0038600	no|up	yes|up	no|up	1
ZX.01G0038630	yes|down	yes|down	yes|down	3
ZX.01G0038650	no|down	yes|down	yes|down	2
ZX.01G0038870	yes|up	yes|up	yes|up	3
ZX.01G0038990	no|down	yes|down	yes|down	2
ZX.01G0039010	yes|down	yes|down	yes|down	3
ZX.01G0039040	no|down	no|down	yes|down	1
ZX.01G0039160	yes|up	no|down	no|down	1
ZX.01G0039230	yes|down	yes|down	yes|down	3
ZX.01G0039310	no|up	no|up	yes|up	1
ZX.01G0039340	no|up	yes|up	yes|up	2
ZX.01G0039350	no|up	no|up	yes|up	1
ZX.01G0039360	no|up	yes|down	yes|down	2
ZX.01G0039450	no|no test	no|up	yes|up	1
ZX.01G0039500	no|up	yes|down	yes|down	2
ZX.01G0039510	no|down	no|down	yes|down	1
ZX.01G0039570	yes|up	no|up	no|up	1
ZX.01G0039580	yes|up	yes|up	no|up	2
ZX.01G0039590	yes|up	yes|up	no|up	2
ZX.01G0039600	no|up	yes|up	no|up	1
ZX.01G0039610	yes|up	yes|up	yes|up	3
ZX.01G0039630	yes|up	no|up	yes|up	2
ZX.01G0039660	yes|down	no|down	no|down	1
ZX.01G0039710	yes|up	no|up	no|up	1
ZX.01G0039730	yes|up	no|up	no|up	1
ZX.01G0039860	no|up	yes|up	yes|up	2
ZX.01G0039870	no|down	no|down	yes|up	1
ZX.01G0039880	no|down	no|up	yes|up	1
ZX.01G0039920	no|up	no|up	yes|up	1
ZX.01G0039990	no|up	yes|up	yes|up	2
ZX.01G0040120	yes|up	yes|up	yes|up	3
ZX.01G0040140	no|up	yes|up	no|up	1
ZX.01G0040180	no|up	yes|up	no|up	1
ZX.01G0040240	no|down	yes|down	yes|down	2
ZX.01G0040270	no|down	yes|down	yes|down	2
ZX.01G0040310	no|down	yes|up	yes|up	2
ZX.01G0040420	yes|down	no|up	no|down	1
ZX.01G0040430	yes|up	yes|up	yes|up	3
ZX.01G0040450	no|down	yes|down	yes|down	2
ZX.01G0040480	yes|down	no|down	no|down	1
ZX.01G0040490	no|down	yes|down	yes|down	2
ZX.01G0040520	yes|down	no|down	no|down	1
ZX.01G0040550	no|up	yes|up	yes|up	2
ZX.01G0040650	no|down	yes|up	no|down	1
ZX.01G0040690	no|down	no|down	yes|down	1
ZX.01G0040730	no|up	yes|down	no|down	1
ZX.01G0040770	no|up	no|up	yes|up	1
ZX.01G0040790	yes|down	yes|down	yes|down	3
ZX.01G0040810	no|up	no|up	yes|up	1
ZX.01G0040830	yes|up	yes|up	no|up	2
ZX.01G0040850	no|down	yes|down	yes|down	2
ZX.01G0041010	no|up	yes|up	no|up	1
ZX.01G0041040	no|down	no|down	yes|down	1
ZX.01G0041080	no|up	yes|up	no|up	1
ZX.01G0041110	no|up	yes|up	no|up	1
ZX.01G0041240	no|up	yes|down	yes|down	2
ZX.01G0041260	yes|down	no|down	no|down	1
ZX.01G0041270	yes|down	yes|down	yes|down	3
ZX.01G0041290	yes|down	no|down	no|down	1
ZX.01G0041340	no|down	yes|down	yes|down	2
ZX.01G0041460	yes|up	no|up	no|down	1
ZX.01G0041470	yes|up	yes|up	yes|up	3
ZX.01G0041520	no|up	yes|down	no|down	1
ZX.01G0041540	no|up	yes|up	yes|up	2
ZX.01G0041580	no|up	yes|down	yes|down	2
ZX.01G0041600	yes|up	no|up	no|up	1
ZX.01G0041620	yes|up	no|no test	no|no test	1
ZX.01G0041630	no|down	no|down	yes|down	1
ZX.01G0041800	yes|up	no|up	no|up	1
ZX.01G0041920	no|up	yes|down	no|down	1
ZX.01G0041940	yes|up	no|up	no|up	1
ZX.01G0041960	no|up	yes|down	yes|down	2
ZX.01G0042020	no|down	no|up	yes|up	1
ZX.01G0042040	yes|down	no|down	no|down	1
ZX.01G0042060	yes|up	yes|up	yes|up	3
ZX.01G0042100	no|down	yes|down	yes|down	2
ZX.01G0042140	yes|up	no|up	no|up	1
ZX.01G0042220	yes|down	yes|down	yes|down	3
ZX.01G0042270	no|down	yes|up	yes|up	2
ZX.01G0042290	no|down	yes|down	yes|down	2
ZX.01G0042300	no|down	no|down	yes|up	1
ZX.01G0042310	no|up	yes|up	yes|up	2
ZX.01G0042330	no|down	yes|down	no|down	1
ZX.01G0042360	no|down	yes|up	no|up	1
ZX.01G0042380	yes|up	no|up	no|down	1
ZX.01G0042390	no|up	yes|down	yes|down	2
ZX.01G0042420	yes|up	yes|up	no|up	2
ZX.01G0042490	no|down	yes|down	yes|down	2
ZX.01G0042520	no|up	yes|up	yes|up	2
ZX.01G0042570	yes|up	no|up	no|up	1
ZX.01G0042610	no|up	yes|up	no|up	1
ZX.01G0042650	no|down	yes|down	no|down	1
ZX.01G0042670	no|up	yes|down	no|down	1
ZX.01G0042770	no|up	no|up	yes|up	1
ZX.01G0042880	yes|up	no|no test	no|down	1
ZX.01G0042910	no|down	no|down	yes|down	1
ZX.01G0042970	yes|up	yes|up	yes|up	3
ZX.01G0043020	yes|up	no|down	no|down	1
ZX.01G0043100	no|up	yes|up	no|up	1
ZX.01G0043110	yes|up	yes|up	yes|up	3
ZX.01G0043230	yes|down	no|up	no|down	1
ZX.01G0043240	no|up	yes|down	yes|down	2
ZX.01G0043300	yes|down	yes|down	no|down	2
ZX.01G0043320	yes|down	yes|down	yes|down	3
ZX.01G0043370	yes|down	yes|down	yes|down	3
ZX.01G0043510	yes|up	no|down	no|up	1
ZX.01G0043670	yes|up	no|up	no|up	1
ZX.01G0043730	no|down	no|down	yes|down	1
ZX.01G0043880	yes|up	no|up	no|up	1
ZX.01G0043970	no|up	yes|up	yes|up	2
ZX.01G0044010	yes|up	no|up	no|up	1
ZX.01G0044130	yes|down	yes|down	yes|down	3
ZX.01G0044140	yes|up	no|up	no|up	1
ZX.01G0044150	yes|up	yes|up	no|up	2
ZX.01G0044190	no|down	no|down	yes|down	1
ZX.01G0044210	no|down	yes|down	yes|down	2
ZX.01G0044290	no|up	no|up	yes|up	1
ZX.01G0044340	yes|up	yes|up	yes|up	3
ZX.01G0044350	yes|up	no|down	no|up	1
ZX.01G0044360	yes|up	yes|up	no|up	2
ZX.01G0044370	no|up	yes|down	yes|down	2
ZX.01G0044380	no|up	yes|up	no|down	1
ZX.01G0044390	no|up	no|up	yes|up	1
ZX.01G0044420	no|down	yes|down	yes|down	2
ZX.01G0044430	no|up	yes|down	no|down	1
ZX.01G0044480	yes|up	no|up	no|up	1
ZX.01G0044490	no|up	yes|down	no|down	1
ZX.01G0044530	yes|up	yes|down	yes|down	3
ZX.01G0044540	yes|up	yes|up	no|up	2
ZX.01G0044550	no|up	yes|up	yes|up	2
ZX.01G0044560	yes|up	no|down	no|down	1
ZX.01G0044610	no|up	yes|up	no|up	1
ZX.01G0044640	no|down	yes|down	no|down	1
ZX.01G0044700	yes|up	no|up	no|up	1
ZX.01G0044730	yes|up	yes|up	yes|up	3
ZX.01G0044740	yes|up	no|up	yes|up	2
ZX.01G0044790	yes|down	no|up	no|up	1
ZX.01G0044800	no|up	yes|up	no|up	1
ZX.01G0044850	yes|down	yes|down	yes|down	3
ZX.01G0044860	yes|down	yes|down	yes|down	3
ZX.01G0044890	yes|up	no|up	no|up	1
ZX.01G0044900	no|up	yes|up	yes|up	2
ZX.01G0044940	yes|down	no|down	no|down	1
ZX.01G0044950	yes|up	no|up	no|up	1
ZX.01G0045040	yes|down	no|down	no|up	1
ZX.01G0045050	no|down	no|down	yes|down	1
ZX.01G0045090	yes|up	no|up	no|up	1
ZX.01G0045110	yes|up	no|down	yes|down	2
ZX.01G0045200	no|up	yes|up	no|down	1
ZX.01G0045230	yes|down	yes|down	no|down	2
ZX.01G0045300	yes|up	yes|up	yes|up	3
ZX.01G0045320	no|up	yes|down	yes|down	2
ZX.01G0045340	yes|up	no|up	no|up	1
ZX.01G0045360	no|down	yes|down	yes|down	2
ZX.01G0045420	no|up	yes|up	yes|up	2
ZX.01G0045480	no|down	no|up	yes|down	1
ZX.01G0045500	yes|up	yes|up	yes|up	3
ZX.01G0045540	yes|up	no|up	no|down	1
ZX.01G0045550	yes|down	yes|down	yes|down	3
ZX.01G0045560	yes|down	no|down	no|down	1
ZX.01G0045680	no|down	no|down	yes|down	1
ZX.01G0045740	no|down	yes|up	no|up	1
ZX.01G0045910	yes|up	no|down	no|up	1
ZX.01G0045920	yes|up	no|down	no|down	1
ZX.01G0045980	no|down	yes|down	no|down	1
ZX.01G0046030	yes|down	no|down	no|down	1
ZX.01G0046040	no|down	yes|up	yes|up	2
ZX.01G0046070	no|down	yes|down	no|down	1
ZX.01G0046080	no|up	yes|up	no|up	1
ZX.01G0046120	no|up	no|up	yes|up	1
ZX.01G0046160	yes|down	no|down	yes|down	2
ZX.01G0046460	no|up	no|up	yes|up	1
ZX.01G0046540	yes|down	no|down	no|down	1
ZX.01G0046630	no|up	yes|up	no|up	1
ZX.01G0046640	yes|down	yes|down	no|down	2
ZX.01G0046710	no|up	yes|up	no|up	1
ZX.01G0046730	yes|down	no|down	no|down	1
ZX.01G0046990	yes|up	no|down	no|down	1
ZX.01G0047000	no|down	yes|down	yes|down	2
ZX.01G0047010	no|up	yes|down	no|down	1
ZX.01G0047020	yes|up	no|no test	no|up	1
ZX.01G0047160	yes|down	no|up	no|up	1
ZX.01G0047220	no|up	yes|up	no|up	1
ZX.01G0047280	no|up	yes|up	yes|up	2
ZX.01G0047300	no|up	yes|up	no|up	1
ZX.01G0047350	no|down	yes|down	no|down	1
ZX.01G0047520	no|down	no|down	yes|down	1
ZX.01G0047540	yes|down	no|up	no|down	1
ZX.01G0047610	yes|down	yes|down	yes|down	3
ZX.01G0047650	yes|down	no|no test	no|no test	1
ZX.01G0047680	no|up	no|down	yes|down	1
ZX.01G0047690	no|down	no|up	yes|up	1
ZX.01G0047710	yes|up	no|down	no|down	1
ZX.01G0047730	yes|up	no|up	no|up	1
ZX.01G0047750	yes|up	yes|up	yes|up	3
ZX.01G0047800	no|up	no|up	yes|up	1
ZX.01G0047820	yes|up	no|up	no|down	1
ZX.01G0047930	no|down	yes|down	yes|down	2
ZX.01G0047950	yes|down	no|down	no|down	1
ZX.01G0047960	yes|down	no|down	no|down	1
ZX.01G0048000	yes|up	yes|up	no|up	2
ZX.01G0048020	no|up	yes|up	no|up	1
ZX.01G0048040	yes|down	yes|down	yes|down	3
ZX.01G0048080	no|up	yes|up	no|up	1
ZX.01G0048110	yes|up	yes|up	yes|up	3
ZX.01G0048150	no|down	yes|down	no|down	1
ZX.01G0048290	no|up	yes|up	no|up	1
ZX.01G0048320	no|up	yes|down	no|down	1
ZX.01G0048400	no|up	yes|up	no|up	1
ZX.01G0048410	yes|up	no|up	no|up	1
ZX.01G0048430	yes|up	yes|up	yes|up	3
ZX.01G0048490	no|up	no|up	yes|up	1
ZX.01G0048560	no|up	no|up	yes|up	1
ZX.01G0048730	yes|up	no|up	no|down	1
ZX.01G0048740	no|up	yes|down	yes|down	2
ZX.01G0048790	yes|up	no|up	yes|up	2
ZX.01G0048920	no|up	yes|down	yes|down	2
ZX.01G0048950	no|up	no|up	yes|up	1
ZX.01G0048960	yes|up	yes|up	yes|up	3
ZX.01G0048970	no|up	no|up	yes|up	1
ZX.01G0048980	no|down	yes|down	yes|down	2
ZX.01G0049040	no|up	no|up	yes|up	1
ZX.01G0049120	yes|up	yes|up	yes|up	3
ZX.01G0049180	no|up	yes|up	yes|up	2
ZX.01G0049340	yes|up	no|up	no|up	1
ZX.01G0049350	no|down	no|down	yes|down	1
ZX.01G0049400	no|down	yes|down	yes|down	2
ZX.01G0049420	no|up	no|down	yes|down	1
ZX.01G0049430	no|up	yes|up	no|up	1
ZX.01G0049610	no|down	yes|down	yes|down	2
ZX.01G0049640	yes|down	no|up	no|down	1
ZX.01G0049690	no|up	yes|down	no|down	1
ZX.01G0049870	no|down	yes|down	yes|down	2
ZX.01G0049880	no|up	no|down	yes|down	1
ZX.01G0049900	no|up	yes|down	no|down	1
ZX.01G0049930	no|up	yes|up	no|up	1
ZX.01G0049970	yes|up	no|down	no|down	1
ZX.01G0050030	yes|up	no|down	no|down	1
ZX.01G0050110	no|up	yes|down	yes|down	2
ZX.01G0050130	yes|up	no|down	no|up	1
ZX.01G0050190	yes|up	no|up	yes|up	2
ZX.01G0050200	no|up	no|up	yes|up	1
ZX.01G0050260	yes|up	no|up	no|up	1
ZX.01G0050320	no|up	yes|up	no|up	1
ZX.01G0050330	no|down	yes|down	no|down	1
ZX.01G0050340	yes|down	yes|down	yes|down	3
ZX.01G0050350	yes|up	yes|up	yes|up	3
ZX.01G0050370	yes|down	no|down	no|down	1
ZX.01G0050460	no|down	yes|down	no|down	1
ZX.01G0050480	no|up	yes|up	no|up	1
ZX.01G0050500	yes|up	yes|up	yes|up	3
ZX.01G0050570	no|down	yes|down	yes|down	2
ZX.01G0050670	no|down	yes|down	no|down	1
ZX.01G0050750	no|up	no|down	yes|down	1
ZX.01G0050810	no|up	yes|up	no|up	1
ZX.01G0050870	no|up	yes|down	no|down	1
ZX.01G0050900	no|down	yes|down	no|down	1
ZX.01G0050940	no|down	yes|up	yes|up	2
ZX.01G0050990	yes|down	no|down	no|down	1
ZX.01G0051010	yes|down	yes|down	no|down	2
ZX.01G0051090	yes|up	yes|up	no|up	2
ZX.01G0051130	yes|up	yes|down	no|down	2
ZX.01G0051190	yes|up	no|up	no|up	1
ZX.01G0051280	no|up	yes|down	no|down	1
ZX.01G0051300	yes|up	yes|up	yes|up	3
ZX.01G0051320	yes|up	yes|up	no|up	2
ZX.01G0051410	no|up	yes|up	yes|up	2
ZX.01G0051430	yes|up	yes|up	yes|up	3
ZX.01G0051500	no|down	no|down	yes|down	1
ZX.01G0051510	yes|down	yes|down	yes|down	3
ZX.01G0051520	yes|up	yes|up	no|up	2
ZX.01G0051560	yes|up	yes|up	yes|up	3
ZX.01G0051640	yes|down	yes|down	no|down	2
ZX.01G0051820	yes|up	yes|up	no|up	2
ZX.01G0051910	no|up	yes|down	yes|down	2
ZX.01G0051950	no|up	yes|up	no|down	1
ZX.01G0052000	no|up	no|up	yes|up	1
ZX.01G0052010	yes|up	yes|up	yes|up	3
ZX.01G0052030	no|up	yes|up	no|up	1
ZX.01G0052050	yes|down	no|down	no|up	1
ZX.01G0052120	no|up	no|up	yes|up	1
ZX.01G0052170	no|down	yes|down	no|down	1
ZX.01G0052180	no|up	yes|down	yes|down	2
ZX.01G0052200	yes|up	yes|up	no|up	2
ZX.01G0052290	no|down	yes|down	no|down	1
ZX.01G0052380	no|up	no|up	yes|up	1
ZX.01G0052410	yes|up	no|up	no|up	1
ZX.01G0052440	yes|up	yes|up	yes|up	3
ZX.01G0052450	no|down	yes|down	yes|down	2
ZX.01G0052490	yes|down	yes|down	yes|down	3
ZX.01G0052650	yes|up	yes|up	yes|up	3
ZX.01G0052720	yes|down	yes|down	yes|down	3
ZX.01G0052740	no|up	no|up	yes|up	1
ZX.01G0052750	yes|down	no|down	no|down	1
ZX.01G0052820	no|up	yes|up	no|up	1
ZX.01G0052850	no|down	yes|down	no|down	1
ZX.01G0052930	yes|down	yes|down	no|down	2
ZX.01G0052960	yes|up	yes|up	yes|up	3
ZX.01G0052980	no|down	yes|down	no|down	1
ZX.01G0053050	no|down	yes|down	yes|down	2
ZX.01G0053060	yes|up	no|up	no|up	1
ZX.01G0053080	no|down	yes|up	yes|up	2
ZX.01G0053100	yes|down	yes|down	yes|down	3
ZX.01G0053160	yes|down	yes|down	yes|down	3
ZX.01G0053230	no|up	yes|up	yes|up	2
ZX.01G0053240	yes|up	yes|up	no|up	2
ZX.01G0053250	yes|down	yes|down	no|down	2
ZX.01G0053290	yes|down	yes|down	no|down	2
ZX.01G0053310	yes|down	yes|down	yes|down	3
ZX.01G0053350	no|up	no|up	yes|up	1
ZX.01G0053380	no|up	no|up	yes|up	1
ZX.01G0053420	no|up	yes|up	no|up	1
ZX.01G0053530	no|down	yes|down	yes|down	2
ZX.01G0053550	yes|down	yes|down	no|up	2
ZX.01G0053560	yes|up	yes|up	yes|up	3
ZX.01G0053570	yes|down	yes|down	no|up	2
ZX.01G0053580	no|down	yes|down	no|down	1
ZX.01G0053630	yes|down	yes|down	yes|down	3
ZX.01G0053670	yes|up	no|up	no|up	1
ZX.01G0053750	yes|up	no|down	no|up	1
ZX.01G0053800	yes|up	yes|up	yes|up	3
ZX.01G0053810	yes|down	no|up	no|up	1
ZX.01G0053820	yes|up	yes|up	yes|up	3
ZX.01G0053840	yes|up	yes|up	yes|up	3
ZX.01G0053850	yes|up	yes|up	yes|up	3
ZX.01G0053870	no|up	yes|up	yes|up	2
ZX.01G0053880	yes|up	yes|up	yes|up	3
ZX.01G0053910	yes|down	yes|down	no|down	2
ZX.01G0053920	yes|down	yes|down	yes|down	3
ZX.01G0053930	no|up	yes|up	yes|up	2
ZX.01G0053940	no|up	yes|up	yes|up	2
ZX.01G0053970	no|down	yes|down	yes|down	2
ZX.01G0053980	yes|down	yes|down	yes|down	3
ZX.01G0054060	yes|down	yes|down	yes|down	3
ZX.01G0054100	yes|up	no|down	no|down	1
ZX.01G0054120	no|down	yes|down	no|down	1
ZX.01G0054160	yes|down	yes|down	yes|down	3
ZX.01G0054180	no|up	yes|down	yes|down	2
ZX.01G0054190	no|up	yes|down	yes|down	2
ZX.01G0054200	no|down	yes|down	yes|down	2
ZX.01G0054220	no|down	yes|down	no|down	1
ZX.01G0054230	yes|down	yes|down	yes|down	3
ZX.01G0054250	no|up	yes|up	yes|up	2
ZX.01G0054260	yes|down	yes|down	no|down	2
ZX.01G0054290	yes|down	yes|down	yes|down	3
ZX.01G0054310	no|down	yes|down	yes|down	2
ZX.01G0054390	yes|up	yes|up	no|up	2
ZX.01G0054490	yes|up	no|up	no|up	1
ZX.01G0054520	no|down	yes|up	yes|up	2
ZX.01G0054570	yes|up	no|up	no|up	1
ZX.01G0054590	no|down	yes|down	yes|down	2
ZX.01G0054760	no|no test	yes|down	no|down	1
ZX.01G0054820	no|up	no|up	yes|up	1
ZX.01G0054830	no|down	no|down	yes|down	1
ZX.01G0054840	no|down	no|down	yes|down	1
ZX.01G0054910	no|up	no|down	yes|down	1
ZX.01G0054930	no|up	no|up	yes|up	1
ZX.01G0054960	no|down	yes|up	yes|up	2
ZX.01G0054980	yes|down	no|down	no|down	1
ZX.01G0055020	no|up	yes|up	yes|up	2
ZX.01G0055040	no|down	yes|up	yes|up	2
ZX.01G0055090	yes|up	yes|up	yes|up	3
ZX.01G0055150	yes|up	yes|up	yes|up	3
ZX.01G0055160	yes|down	yes|down	yes|down	3
ZX.01G0055260	no|up	yes|down	yes|down	2
ZX.01G0055310	yes|up	no|up	no|up	1
ZX.01G0055320	yes|down	no|down	no|up	1
ZX.01G0055430	yes|down	yes|down	yes|down	3
ZX.01G0055460	yes|down	yes|down	yes|down	3
ZX.01G0055490	yes|up	yes|up	no|up	2
ZX.01G0055560	no|down	yes|up	no|up	1
ZX.01G0055600	no|up	yes|down	no|down	1
ZX.01G0055660	no|up	yes|down	yes|down	2
ZX.01G0055690	yes|down	yes|down	yes|down	3
ZX.01G0055760	no|down	no|down	yes|down	1
ZX.01G0055780	yes|down	yes|down	no|down	2
ZX.01G0055820	yes|up	no|up	no|up	1
ZX.01G0055870	yes|up	no|up	yes|up	2
ZX.01G0055910	yes|up	no|up	yes|down	2
ZX.01G0055940	no|up	no|up	yes|up	1
ZX.01G0056020	no|down	yes|down	yes|down	2
ZX.01G0056030	no|down	yes|down	yes|down	2
ZX.01G0056050	yes|up	no|down	no|down	1
ZX.01G0056170	no|up	yes|down	yes|down	2
ZX.01G0056210	yes|up	yes|up	yes|up	3
ZX.01G0056290	no|down	yes|down	no|down	1
ZX.01G0056350	no|up	yes|up	no|up	1
ZX.01G0056400	no|up	no|up	yes|up	1
ZX.01G0056420	no|down	no|down	yes|down	1
ZX.01G0056470	yes|down	no|down	no|down	1
ZX.01G0056520	yes|up	no|up	no|up	1
ZX.01G0056560	no|up	yes|down	no|down	1
ZX.01G0056610	no|up	no|down	yes|down	1
ZX.01G0056730	no|up	yes|up	no|up	1
ZX.01G0056740	yes|up	no|down	no|down	1
ZX.01G0056780	yes|up	no|up	no|up	1
ZX.01G0056820	no|down	yes|down	no|down	1
ZX.01G0056870	no|down	yes|down	no|down	1
ZX.01G0056890	yes|up	yes|up	no|up	2
ZX.01G0056930	no|up	yes|down	no|down	1
ZX.01G0056990	yes|down	no|up	no|up	1
ZX.01G0057000	no|up	yes|down	no|down	1
ZX.01G0057010	no|up	yes|up	yes|up	2
ZX.01G0057030	no|down	no|up	yes|up	1
ZX.01G0057070	yes|up	yes|up	yes|up	3
ZX.01G0057100	yes|down	yes|down	yes|down	3
ZX.01G0057150	no|down	yes|down	yes|down	2
ZX.01G0057160	no|down	yes|up	no|up	1
ZX.01G0057210	no|down	yes|down	no|down	1
ZX.01G0057240	yes|up	yes|up	no|up	2
ZX.01G0057350	yes|down	yes|down	yes|down	3
ZX.01G0057390	yes|up	no|up	no|down	1
ZX.01G0057420	yes|down	yes|down	yes|down	3
ZX.01G0057430	no|up	no|up	yes|up	1
ZX.01G0057440	no|down	yes|down	yes|down	2
ZX.01G0057450	yes|up	yes|up	no|up	2
ZX.01G0057610	no|up	yes|up	no|up	1
ZX.01G0057630	yes|up	no|up	no|up	1
ZX.01G0057710	no|up	yes|down	no|down	1
ZX.01G0057770	yes|down	yes|down	no|down	2
ZX.01G0057780	yes|up	yes|up	yes|up	3
ZX.01G0057790	yes|up	yes|up	yes|up	3
ZX.01G0057820	yes|up	yes|up	yes|up	3
ZX.01G0057890	no|down	no|up	yes|up	1
ZX.01G0057930	yes|down	yes|down	no|down	2
ZX.01G0058040	yes|down	yes|down	no|down	2
ZX.01G0058050	yes|down	no|down	no|down	1
ZX.01G0058060	yes|down	yes|down	yes|down	3
ZX.01G0058100	no|up	yes|up	no|up	1
ZX.01G0058130	yes|up	yes|up	yes|up	3
ZX.01G0058140	yes|up	yes|up	yes|up	3
ZX.01G0058150	yes|up	no|up	no|up	1
ZX.01G0058190	yes|up	yes|up	yes|up	3
ZX.01G0058220	no|down	yes|down	yes|down	2
ZX.01G0058230	yes|up	no|up	no|up	1
ZX.01G0058290	no|up	yes|down	yes|down	2
ZX.01G0058330	no|down	yes|down	no|down	1
ZX.01G0058380	no|up	yes|up	yes|up	2
ZX.01G0058400	yes|down	no|down	no|down	1
ZX.01G0058460	no|up	yes|up	no|up	1
ZX.01G0058540	no|up	yes|up	yes|up	2
ZX.01G0058640	no|up	yes|down	no|down	1
ZX.01G0058670	yes|up	no|up	no|up	1
ZX.01G0058720	yes|up	no|up	no|up	1
ZX.01G0058820	yes|up	no|up	no|up	1
ZX.01G0058850	no|up	yes|up	no|up	1
ZX.01G0058890	yes|up	yes|up	yes|up	3
ZX.01G0058930	yes|up	no|up	yes|up	2
ZX.01G0058990	yes|up	yes|up	no|up	2
ZX.01G0059000	yes|down	yes|down	yes|down	3
ZX.01G0059030	no|down	yes|down	no|down	1
ZX.01G0059130	yes|down	no|down	yes|down	2
ZX.01G0059140	yes|up	no|up	no|up	1
ZX.01G0059150	yes|up	no|up	no|up	1
ZX.01G0059230	yes|up	yes|up	yes|up	3
ZX.01G0059270	yes|up	no|down	no|down	1
ZX.01G0059280	no|down	no|down	yes|up	1
ZX.01G0059300	no|up	no|up	yes|up	1
ZX.01G0059340	no|down	yes|down	no|down	1
ZX.01G0059380	yes|up	yes|down	no|down	2
ZX.01G0059410	no|up	yes|down	no|down	1
ZX.01G0059530	no|up	yes|up	no|up	1
ZX.01G0059600	no|down	yes|down	yes|down	2
ZX.01G0059620	no|down	yes|down	no|down	1
ZX.01G0059730	no|up	yes|up	no|down	1
ZX.01G0059850	yes|down	no|down	yes|down	2
ZX.01G0059890	yes|up	no|up	yes|up	2
ZX.01G0059900	yes|up	yes|up	yes|up	3
ZX.01G0059920	yes|up	yes|up	yes|up	3
ZX.01G0059930	no|up	no|up	yes|up	1
ZX.01G0059990	no|down	yes|up	no|up	1
ZX.01G0060050	no|up	yes|up	no|up	1
ZX.01G0060060	no|up	no|up	yes|up	1
ZX.01G0060100	yes|up	no|up	no|up	1
ZX.01G0060120	yes|down	no|down	no|down	1
ZX.01G0060180	yes|up	no|down	no|down	1
ZX.01G0060420	yes|up	no|up	no|up	1
ZX.01G0060440	yes|up	yes|up	no|up	2
ZX.01G0060550	yes|up	no|up	no|up	1
ZX.01G0060690	yes|down	yes|down	yes|down	3
ZX.01G0060720	no|up	no|down	yes|down	1
ZX.01G0060740	no|up	yes|up	no|up	1
ZX.01G0060760	no|up	no|down	yes|down	1
ZX.01G0060840	yes|up	no|up	no|up	1
ZX.01G0060870	no|down	no|down	yes|down	1
ZX.01G0060920	yes|up	no|up	no|up	1
ZX.01G0060930	no|up	yes|up	yes|up	2
ZX.01G0060970	no|up	yes|up	no|up	1
ZX.01G0060980	no|up	yes|up	no|up	1
ZX.01G0061020	yes|up	no|up	no|up	1
ZX.01G0061040	yes|up	yes|up	yes|up	3
ZX.01G0061100	yes|down	yes|down	yes|down	3
ZX.01G0061130	yes|up	no|up	no|up	1
ZX.01G0061180	yes|up	yes|up	no|up	2
ZX.01G0061220	no|up	yes|up	yes|up	2
ZX.01G0061230	yes|up	yes|up	yes|up	3
ZX.01G0061280	no|down	yes|up	yes|up	2
ZX.01G0061320	yes|down	no|down	no|down	1
ZX.01G0061330	no|down	yes|down	no|down	1
ZX.01G0061430	yes|up	no|down	no|down	1
ZX.01G0061510	no|up	yes|up	yes|up	2
ZX.01G0061580	yes|up	yes|up	yes|up	3
ZX.01G0061750	no|up	yes|down	yes|down	2
ZX.01G0061790	yes|up	yes|up	yes|up	3
ZX.01G0061820	no|down	no|down	yes|down	1
ZX.01G0061910	yes|up	no|up	no|up	1
ZX.01G0061980	no|down	yes|down	yes|down	2
ZX.01G0062000	no|down	yes|down	yes|down	2
ZX.01G0062140	no|down	yes|down	yes|down	2
ZX.01G0062180	no|down	yes|down	yes|down	2
ZX.01G0062270	no|up	yes|up	yes|up	2
ZX.01G0062300	no|up	yes|down	yes|down	2
ZX.01G0062320	yes|up	yes|up	yes|up	3
ZX.01G0062380	yes|up	yes|up	no|up	2
ZX.01G0062410	no|up	yes|up	yes|up	2
ZX.01G0062500	yes|down	no|down	no|down	1
ZX.01G0062540	no|down	yes|down	yes|down	2
ZX.01G0062560	no|down	no|up	yes|down	1
ZX.01G0062570	yes|up	yes|up	yes|up	3
ZX.01G0062580	yes|up	yes|up	no|up	2
ZX.01G0062590	no|down	yes|down	no|down	1
ZX.01G0062610	no|down	yes|down	yes|down	2
ZX.01G0062630	no|up	yes|up	yes|up	2
ZX.01G0062640	no|up	yes|down	no|down	1
ZX.01G0062670	yes|up	yes|up	yes|up	3
ZX.01G0062770	yes|up	yes|up	yes|up	3
ZX.01G0062790	yes|up	yes|up	no|up	2
ZX.01G0062800	yes|up	yes|up	yes|up	3
ZX.01G0062810	yes|up	yes|up	yes|up	3
ZX.01G0062820	yes|up	yes|up	yes|up	3
ZX.01G0062840	yes|up	yes|up	yes|up	3
ZX.01G0062940	yes|down	no|down	no|down	1
ZX.01G0062960	yes|down	yes|down	yes|down	3
ZX.01G0062980	yes|down	no|down	yes|down	2
ZX.01G0062990	yes|down	no|down	no|down	1
ZX.01G0063010	no|up	yes|up	yes|up	2
ZX.01G0063120	yes|down	yes|down	no|down	2
ZX.01G0063170	yes|up	yes|up	yes|up	3
ZX.01G0063210	yes|up	no|up	no|up	1
ZX.01G0063270	yes|up	no|down	no|down	1
ZX.01G0063280	no|up	yes|down	yes|down	2
ZX.01G0063290	no|up	no|up	yes|up	1
ZX.01G0063350	yes|up	yes|up	no|up	2
ZX.01G0063360	no|up	yes|down	no|no test	1
ZX.01G0063370	yes|up	yes|up	no|up	2
ZX.01G0063400	yes|up	yes|up	no|up	2
ZX.01G0063410	yes|up	yes|up	no|up	2
ZX.01G0063480	no|down	yes|down	yes|down	2
ZX.01G0063490	no|down	yes|down	yes|down	2
ZX.01G0063600	yes|up	no|up	yes|up	2
ZX.01G0063610	no|up	yes|up	yes|up	2
ZX.01G0063620	yes|up	no|up	no|up	1
ZX.01G0063630	yes|up	yes|up	yes|up	3
ZX.01G0063670	yes|down	no|down	no|down	1
ZX.01G0063820	no|down	yes|down	no|down	1
ZX.01G0063880	yes|up	yes|up	no|down	2
ZX.01G0063980	no|down	yes|down	yes|down	2
ZX.01G0064000	yes|down	no|down	no|down	1
ZX.01G0064040	yes|up	yes|up	yes|up	3
ZX.01G0064060	yes|up	yes|up	no|up	2
ZX.01G0064140	no|up	yes|up	yes|up	2
ZX.01G0064290	yes|down	no|down	yes|down	2
ZX.01G0064300	yes|down	yes|down	yes|down	3
ZX.01G0064310	yes|up	yes|up	yes|up	3
ZX.01G0064340	yes|up	no|up	no|down	1
ZX.01G0064350	yes|down	no|down	yes|down	2
ZX.01G0064410	yes|up	no|up	no|up	1
ZX.01G0064460	no|up	yes|down	no|down	1
ZX.01G0064510	no|down	no|up	yes|up	1
ZX.01G0064550	no|up	yes|up	yes|up	2
ZX.01G0064560	no|up	yes|up	no|up	1
ZX.01G0064570	yes|up	no|up	no|up	1
ZX.01G0064580	no|down	no|down	yes|down	1
ZX.01G0064590	no|up	yes|down	no|down	1
ZX.01G0064640	no|up	yes|down	yes|down	2
ZX.01G0064690	yes|up	yes|up	yes|up	3
ZX.01G0064710	no|up	yes|up	no|up	1
ZX.01G0064720	yes|up	yes|up	yes|up	3
ZX.01G0064730	yes|up	yes|up	yes|up	3
ZX.01G0064750	yes|up	yes|up	yes|up	3
ZX.01G0064780	no|down	yes|up	yes|up	2
ZX.01G0064850	no|down	yes|down	no|down	1
ZX.01G0064860	no|up	no|up	yes|down	1
ZX.01G0064930	no|down	yes|up	no|up	1
ZX.01G0064940	no|down	yes|up	yes|up	2
ZX.01G0065000	yes|down	yes|down	no|down	2
ZX.01G0065010	no|up	no|up	yes|down	1
ZX.01G0065030	yes|down	yes|up	yes|up	3
ZX.01G0065220	no|up	yes|up	yes|up	2
ZX.01G0065260	yes|down	no|down	no|down	1
ZX.01G0065330	yes|up	no|up	no|up	1
ZX.01G0065360	yes|up	yes|up	yes|up	3
ZX.01G0065440	yes|up	yes|up	yes|up	3
ZX.01G0065450	yes|down	yes|down	yes|down	3
ZX.01G0065500	no|up	no|up	yes|up	1
ZX.01G0065530	yes|up	no|down	no|up	1
ZX.01G0065540	yes|up	no|up	no|up	1
ZX.01G0065570	yes|up	no|down	no|down	1
ZX.01G0065640	yes|down	yes|down	yes|down	3
ZX.01G0065660	no|down	yes|down	no|down	1
ZX.01G0065710	no|up	yes|up	yes|up	2
ZX.01G0065730	yes|down	yes|down	yes|down	3
ZX.01G0065770	yes|up	no|no test	no|up	1
ZX.01G0065810	yes|up	yes|up	yes|up	3
ZX.01G0065820	yes|up	yes|up	no|up	2
ZX.01G0065880	no|up	no|up	yes|up	1
ZX.01G0065890	yes|up	no|up	no|up	1
ZX.01G0065920	yes|up	no|up	no|up	1
ZX.01G0066150	no|up	yes|up	yes|up	2
ZX.01G0066200	no|up	yes|down	no|down	1
ZX.01G0066210	yes|up	yes|up	yes|up	3
ZX.01G0066220	yes|up	yes|up	yes|up	3
ZX.01G0066240	yes|up	yes|up	yes|up	3
ZX.01G0066250	yes|down	yes|down	no|down	2
ZX.01G0066260	no|up	yes|up	no|up	1
ZX.01G0066270	yes|up	yes|up	yes|up	3
ZX.01G0066280	no|up	yes|down	yes|down	2
ZX.01G0066290	no|up	yes|up	no|up	1
ZX.01G0066300	no|up	yes|down	yes|down	2
ZX.01G0066340	yes|down	no|down	no|down	1
ZX.01G0066350	yes|down	no|down	no|down	1
ZX.01G0066380	yes|up	no|down	no|down	1
ZX.01G0066400	yes|up	no|up	no|up	1
ZX.01G0066420	no|up	no|up	yes|up	1
ZX.01G0066520	no|down	yes|down	yes|down	2
ZX.01G0066530	no|down	yes|down	yes|down	2
ZX.01G0066540	yes|down	no|down	no|down	1
ZX.01G0066550	no|up	yes|up	no|up	1
ZX.01G0066560	yes|down	yes|down	yes|down	3
ZX.01G0066580	yes|down	yes|down	yes|down	3
ZX.01G0066680	yes|down	yes|down	yes|down	3
ZX.01G0066900	yes|down	no|down	no|down	1
ZX.01G0066930	yes|up	yes|up	yes|up	3
ZX.01G0066940	yes|up	yes|up	yes|up	3
ZX.01G0066990	yes|up	yes|up	yes|up	3
ZX.01G0067000	yes|down	no|down	no|down	1
ZX.01G0067010	yes|up	yes|up	yes|up	3
ZX.01G0067030	no|up	yes|up	yes|up	2
ZX.01G0067070	yes|down	no|down	no|down	1
ZX.01G0067220	no|down	yes|down	no|down	1
ZX.01G0067340	yes|down	yes|down	no|down	2
ZX.01G0067360	yes|up	no|up	no|up	1
ZX.01G0067390	yes|down	yes|down	yes|down	3
ZX.01G0067420	yes|up	no|down	yes|down	2
ZX.01G0067470	yes|down	no|down	no|down	1
ZX.01G0067480	yes|up	yes|up	yes|up	3
ZX.01G0067500	yes|down	yes|down	yes|down	3
ZX.01G0067520	yes|up	yes|up	yes|up	3
ZX.01G0067530	no|down	yes|up	yes|up	2
ZX.01G0067550	yes|up	no|up	no|up	1
ZX.01G0067570	no|down	yes|down	yes|down	2
ZX.01G0067670	yes|down	no|down	no|down	1
ZX.01G0067760	yes|down	no|down	no|down	1
ZX.01G0067820	no|down	yes|down	no|down	1
ZX.01G0067850	yes|up	yes|up	no|up	2
ZX.01G0067890	no|down	no|up	yes|up	1
ZX.01G0067920	no|down	yes|down	yes|down	2
ZX.01G0067930	no|down	no|down	yes|down	1
ZX.01G0068020	no|up	yes|up	no|up	1
ZX.01G0068040	yes|up	yes|up	yes|up	3
ZX.01G0068050	yes|up	yes|up	yes|up	3
ZX.01G0068060	yes|up	yes|up	yes|up	3
ZX.01G0068120	no|up	yes|up	yes|up	2
ZX.01G0068240	yes|up	yes|up	yes|up	3
ZX.01G0068480	yes|up	no|up	no|up	1
ZX.01G0068640	no|up	no|up	yes|up	1
ZX.01G0068730	no|up	yes|up	no|up	1
ZX.01G0068760	no|up	no|down	yes|down	1
ZX.01G0068770	no|up	yes|down	yes|down	2
ZX.01G0068830	no|up	yes|up	yes|up	2
ZX.01G0068920	yes|up	yes|up	yes|up	3
ZX.01G0069010	no|down	no|down	yes|down	1
ZX.01G0069020	no|up	no|down	yes|down	1
ZX.01G0069130	yes|up	yes|up	yes|up	3
ZX.01G0069160	no|up	no|down	yes|down	1
ZX.01G0069170	yes|up	no|down	no|down	1
ZX.01G0069280	no|up	yes|up	yes|up	2
ZX.01G0069400	no|down	yes|down	yes|down	2
ZX.01G0069410	no|down	yes|down	yes|down	2
ZX.01G0069490	yes|up	yes|up	yes|up	3
ZX.01G0069510	no|up	no|up	yes|up	1
ZX.01G0069520	yes|up	yes|up	yes|up	3
ZX.01G0069530	yes|up	yes|up	yes|up	3
ZX.01G0069540	no|up	yes|up	no|down	1
ZX.01G0069560	yes|up	yes|up	yes|up	3
ZX.01G0069660	yes|up	yes|up	yes|up	3
ZX.01G0069750	no|down	yes|down	yes|down	2
ZX.01G0069790	no|up	yes|up	yes|up	2
ZX.01G0069830	yes|down	yes|up	yes|up	3
ZX.01G0069910	no|down	yes|down	yes|down	2
ZX.01G0069960	yes|up	no|up	no|up	1
ZX.01G0069980	yes|down	no|down	no|down	1
ZX.01G0070170	yes|up	yes|up	no|up	2
ZX.01G0070180	no|up	yes|up	yes|up	2
ZX.01G0070200	no|down	yes|down	yes|down	2
ZX.01G0070240	yes|up	yes|up	yes|up	3
ZX.01G0070260	no|up	no|down	yes|up	1
ZX.01G0070320	no|down	yes|down	yes|down	2
ZX.01G0070340	no|up	yes|up	yes|up	2
ZX.01G0070350	yes|up	yes|up	yes|up	3
ZX.01G0070400	no|down	yes|down	yes|down	2
ZX.01G0070430	no|up	no|down	yes|down	1
ZX.01G0070460	no|up	yes|up	no|up	1
ZX.01G0070500	yes|up	no|down	no|down	1
ZX.01G0070520	no|down	yes|down	no|down	1
ZX.01G0070550	yes|up	no|up	no|up	1
ZX.01G0070570	no|up	yes|up	yes|up	2
ZX.01G0070650	yes|up	yes|up	yes|up	3
ZX.01G0070690	no|down	no|up	yes|up	1
ZX.01G0070710	yes|down	no|down	no|down	1
ZX.01G0070740	yes|down	yes|down	yes|down	3
ZX.01G0070750	yes|down	yes|down	yes|down	3
ZX.01G0070770	yes|down	yes|down	yes|down	3
ZX.01G0070780	yes|down	no|up	no|no test	1
ZX.01G0070850	yes|down	yes|down	no|down	2
ZX.01G0070930	yes|up	yes|up	yes|up	3
ZX.01G0071040	no|up	yes|up	no|up	1
ZX.01G0071070	no|up	yes|down	no|up	1
ZX.01G0071090	no|up	yes|up	yes|up	2
ZX.01G0071100	yes|up	no|down	no|up	1
ZX.01G0071150	yes|up	yes|up	yes|up	3
ZX.01G0071170	no|up	yes|up	yes|up	2
ZX.01G0071190	yes|up	no|up	yes|up	2
ZX.01G0071290	no|up	yes|down	yes|down	2
ZX.01G0071460	yes|up	yes|up	yes|up	3
ZX.01G0071570	no|down	yes|down	yes|down	2
ZX.01G0071600	no|down	yes|down	yes|down	2
ZX.01G0071640	yes|up	yes|up	yes|up	3
ZX.01G0071680	yes|down	yes|down	no|down	2
ZX.01G0071710	yes|up	yes|up	no|up	2
ZX.01G0071780	no|up	no|down	yes|up	1
ZX.01G0071850	yes|up	yes|up	yes|up	3
ZX.01G0071870	yes|down	yes|down	yes|down	3
ZX.01G0071920	yes|up	no|no test	no|no test	1
ZX.01G0072060	no|up	no|down	yes|down	1
ZX.01G0072130	no|down	no|down	yes|down	1
ZX.01G0072180	no|down	yes|down	no|no change	1
ZX.01G0072250	no|down	yes|down	no|down	1
ZX.01G0072330	yes|up	no|up	no|down	1
ZX.01G0072350	yes|up	no|down	no|down	1
ZX.01G0072410	no|down	no|down	yes|down	1
ZX.01G0072430	no|down	yes|down	no|down	1
ZX.01G0072450	yes|up	yes|up	yes|up	3
ZX.01G0072470	no|down	no|down	yes|down	1
ZX.01G0072520	yes|down	no|down	yes|down	2
ZX.01G0072560	no|up	yes|down	yes|down	2
ZX.01G0072590	no|down	yes|down	no|down	1
ZX.01G0072600	yes|up	no|up	no|up	1
ZX.01G0072630	no|up	yes|up	yes|up	2
ZX.01G0072790	yes|up	yes|up	no|up	2
ZX.01G0072890	yes|up	no|down	no|down	1
ZX.01G0072920	yes|up	yes|up	no|up	2
ZX.01G0073030	no|down	no|down	yes|down	1
ZX.01G0073060	yes|down	no|down	yes|down	2
ZX.01G0073090	no|down	yes|down	yes|down	2
ZX.01G0073160	no|up	yes|down	yes|down	2
ZX.01G0073180	no|up	yes|up	no|up	1
ZX.01G0073200	yes|up	no|up	no|down	1
ZX.01G0073220	no|up	yes|up	no|up	1
ZX.01G0073280	yes|down	yes|down	yes|down	3
ZX.01G0073340	no|down	yes|up	no|up	1
ZX.01G0073380	no|down	yes|down	no|down	1
ZX.01G0073440	no|up	yes|down	yes|down	2
ZX.01G0073560	no|down	yes|down	yes|down	2
ZX.01G0073580	yes|up	yes|up	yes|up	3
ZX.01G0073600	yes|up	no|up	no|up	1
ZX.01G0073720	no|up	yes|up	no|up	1
ZX.01G0073870	yes|down	yes|down	yes|down	3
ZX.01G0073880	no|down	yes|down	yes|down	2
ZX.01G0073970	yes|up	no|up	no|up	1
ZX.01G0074110	yes|down	yes|down	yes|down	3
ZX.01G0074330	no|down	no|down	yes|down	1
ZX.01G0074420	yes|up	no|up	no|up	1
ZX.01G0074480	yes|up	no|down	no|down	1
ZX.01G0074550	no|down	no|up	yes|down	1
ZX.01G0074560	yes|up	yes|up	no|down	2
ZX.01G0074640	no|down	yes|down	no|down	1
ZX.01G0074850	yes|up	no|up	no|down	1
ZX.01G0074980	no|down	yes|up	no|up	1
ZX.01G0075070	no|up	yes|down	no|no test	1
ZX.01G0075100	yes|up	yes|up	no|up	2
ZX.01G0075110	yes|down	no|down	no|down	1
ZX.01G0075260	yes|up	yes|up	yes|up	3
ZX.01G0075280	yes|up	yes|up	yes|up	3
ZX.01G0075340	no|down	no|down	yes|down	1
ZX.01G0075380	no|up	yes|up	no|up	1
ZX.01G0075410	no|down	yes|down	no|down	1
ZX.01G0075480	no|down	yes|up	yes|up	2
ZX.01G0075560	no|up	no|down	yes|down	1
ZX.01G0075630	yes|down	yes|down	yes|down	3
ZX.01G0075740	yes|up	yes|up	yes|up	3
ZX.01G0075780	yes|down	no|down	no|down	1
ZX.01G0075820	no|down	yes|down	yes|down	2
ZX.01G0075830	yes|up	no|no test	no|no change	1
ZX.01G0075840	yes|down	no|down	no|down	1
ZX.01G0075870	no|down	no|up	yes|up	1
ZX.01G0075930	no|down	no|down	yes|down	1
ZX.01G0075990	no|down	yes|down	yes|down	2
ZX.01G0076010	yes|up	no|no test	no|no change	1
ZX.01G0076080	no|down	yes|down	yes|down	2
ZX.01G0076110	yes|down	yes|down	yes|down	3
ZX.01G0076120	yes|up	no|up	yes|up	2
ZX.01G0076280	no|up	no|down	yes|down	1
ZX.01G0076290	no|up	yes|up	yes|up	2
ZX.01G0076330	yes|down	no|down	no|down	1
ZX.01G0076360	no|up	yes|up	yes|up	2
ZX.01G0076410	yes|down	no|down	no|down	1
ZX.01G0076430	yes|up	yes|up	yes|up	3
ZX.01G0076440	yes|up	yes|up	yes|up	3
ZX.01G0076450	yes|up	yes|up	yes|up	3
ZX.01G0076460	no|up	yes|up	yes|up	2
ZX.01G0076480	yes|up	no|up	no|up	1
ZX.01G0076500	no|down	no|down	yes|down	1
ZX.01G0076560	yes|down	no|up	yes|up	2
ZX.01G0076580	yes|down	no|down	no|down	1
ZX.01G0076620	yes|up	yes|up	yes|up	3
ZX.01G0076650	yes|up	yes|up	yes|up	3
ZX.01G0076700	no|up	yes|down	yes|down	2
ZX.01G0076710	no|up	yes|up	yes|up	2
ZX.01G0076720	no|down	yes|up	no|up	1
ZX.01G0076730	yes|up	yes|up	yes|up	3
ZX.01G0076740	yes|up	yes|up	yes|up	3
ZX.01G0076860	no|up	yes|down	no|down	1
ZX.01G0077040	no|down	yes|down	no|down	1
ZX.01G0077110	yes|up	no|up	yes|up	2
ZX.01G0077120	yes|up	no|down	no|down	1
ZX.01G0077130	yes|down	yes|down	no|down	2
ZX.01G0077150	yes|up	no|no test	no|no test	1
ZX.01G0077400	yes|up	yes|up	no|up	2
ZX.01G0077520	no|down	yes|up	yes|up	2
ZX.01G0077580	yes|up	yes|up	yes|up	3
ZX.01G0077600	no|up	yes|up	no|up	1
ZX.01G0077660	no|up	yes|up	yes|up	2
ZX.01G0077690	yes|down	yes|down	yes|down	3
ZX.01G0077830	yes|down	yes|down	yes|down	3
ZX.01G0077870	yes|down	yes|down	yes|down	3
ZX.01G0077890	yes|down	no|down	no|down	1
ZX.01G0077960	yes|up	yes|up	no|up	2
ZX.01G0077980	yes|down	no|down	no|down	1
ZX.01G0078260	yes|down	yes|down	yes|down	3
ZX.01G0078290	no|up	yes|up	yes|up	2
ZX.01G0078320	no|up	yes|up	no|up	1
ZX.01G0078330	yes|down	yes|down	yes|down	3
ZX.01G0078350	no|down	yes|up	yes|up	2
ZX.01G0078440	no|down	yes|down	no|down	1
ZX.01G0078630	no|down	yes|down	yes|down	2
ZX.01G0078640	no|up	yes|down	yes|down	2
ZX.01G0078650	yes|down	no|down	no|down	1
ZX.01G0078770	yes|down	yes|down	no|down	2
ZX.01G0078940	yes|down	yes|up	no|up	2
ZX.01G0078950	yes|down	yes|up	yes|up	3
ZX.01G0078960	yes|up	yes|up	yes|up	3
ZX.01G0078990	no|down	no|down	yes|down	1
ZX.01G0079100	yes|down	yes|down	yes|down	3
ZX.01G0079110	yes|down	yes|down	yes|down	3
ZX.01G0079260	yes|up	yes|down	yes|down	3
ZX.01G0079320	yes|down	no|down	no|down	1
ZX.01G0079330	yes|up	yes|up	no|up	2
ZX.01G0079580	no|down	yes|down	yes|down	2
ZX.01G0079630	yes|down	yes|down	yes|down	3
ZX.01G0079670	yes|up	yes|up	yes|up	3
ZX.01G0079720	yes|down	no|down	no|up	1
ZX.01G0079820	no|up	yes|down	no|down	1
ZX.01G0079850	no|down	yes|down	yes|down	2
ZX.01G0079890	yes|down	no|down	no|up	1
ZX.01G0079900	yes|up	yes|up	yes|up	3
ZX.01G0079910	no|down	yes|down	no|down	1
ZX.01G0080050	yes|down	yes|down	no|down	2
ZX.01G0080080	yes|up	yes|up	yes|up	3
ZX.01G0080090	yes|down	no|up	no|up	1
ZX.01G0080120	yes|up	yes|up	yes|up	3
ZX.01G0080130	yes|up	no|up	no|up	1
ZX.01G0080190	yes|down	no|down	no|down	1
ZX.01G0080200	no|down	yes|down	no|down	1
ZX.01G0080210	yes|down	yes|down	yes|down	3
ZX.01G0080220	yes|down	yes|down	yes|down	3
ZX.01G0080240	yes|up	no|down	no|down	1
ZX.01G0080260	yes|up	no|up	no|up	1
ZX.01G0080300	no|up	yes|up	no|up	1
ZX.01G0080320	no|down	yes|down	yes|down	2
ZX.01G0080350	yes|down	no|down	no|down	1
ZX.01G0080410	no|down	yes|up	no|up	1
ZX.01G0080520	yes|up	yes|up	yes|up	3
ZX.01G0080540	no|up	yes|up	no|up	1
ZX.01G0080570	yes|up	yes|up	yes|up	3
ZX.01G0080600	yes|up	yes|up	yes|up	3
ZX.01G0080630	yes|up	yes|up	yes|up	3
ZX.01G0080650	yes|down	no|down	no|down	1
ZX.01G0080660	yes|up	yes|up	yes|up	3
ZX.01G0080670	no|up	yes|up	yes|up	2
ZX.01G0080720	no|up	yes|down	yes|down	2
ZX.01G0080780	no|up	yes|up	no|up	1
ZX.01G0080800	yes|down	yes|down	yes|down	3
ZX.01G0080820	yes|down	yes|up	no|up	2
ZX.01G0080860	yes|up	no|up	yes|up	2
ZX.01G0080870	yes|up	yes|up	yes|up	3
ZX.01G0080890	no|down	no|down	yes|down	1
ZX.01G0080910	no|up	yes|up	yes|up	2
ZX.01G0080920	yes|up	yes|up	yes|up	3
ZX.01G0080930	yes|up	yes|up	yes|up	3
ZX.01G0080990	no|down	yes|down	yes|down	2
ZX.01G0081010	no|down	yes|down	no|down	1
ZX.01G0081070	yes|up	no|up	no|up	1
ZX.01G0081130	no|up	yes|up	no|up	1
ZX.01G0081140	yes|down	yes|down	yes|down	3
ZX.01G0081220	yes|up	no|up	no|up	1
ZX.01G0081250	yes|up	yes|up	yes|up	3
ZX.01G0081490	yes|down	no|down	no|down	1
ZX.01G0081500	yes|down	no|down	no|down	1
ZX.01G0081550	no|down	no|down	yes|down	1
ZX.01G0081630	yes|down	yes|down	yes|down	3
ZX.01G0081870	yes|up	no|up	no|up	1
ZX.01G0081960	no|up	yes|down	yes|down	2
ZX.01G0081970	no|down	no|up	yes|down	1
ZX.01G0081980	no|down	yes|down	yes|down	2
ZX.01G0081990	no|down	yes|down	yes|down	2
ZX.01G0082250	yes|down	yes|down	yes|down	3
ZX.01G0082260	yes|down	yes|down	yes|down	3
ZX.01G0082390	yes|up	yes|up	yes|up	3
ZX.01G0082420	yes|up	no|up	no|up	1
ZX.01G0082430	yes|up	no|up	no|up	1
ZX.01G0082440	yes|up	no|up	no|up	1
ZX.01G0082450	yes|up	no|up	no|up	1
ZX.01G0082470	yes|up	yes|up	no|up	2
ZX.01G0082560	no|up	yes|down	no|down	1
ZX.01G0082570	no|down	yes|down	no|down	1
ZX.01G0082590	no|up	no|up	yes|up	1
ZX.01G0082600	yes|up	no|down	no|down	1
ZX.01G0082620	no|up	yes|up	no|down	1
ZX.01G0082640	yes|up	yes|up	yes|up	3
ZX.01G0082700	yes|up	no|up	no|down	1
ZX.01G0082770	yes|down	no|down	no|down	1
ZX.01G0082800	yes|up	no|up	no|up	1
ZX.01G0082810	yes|up	no|up	no|down	1
ZX.01G0082820	yes|up	yes|up	yes|up	3
ZX.01G0082840	no|up	no|up	yes|up	1
ZX.01G0082850	yes|up	yes|up	yes|up	3
ZX.01G0082870	no|down	no|down	yes|down	1
ZX.01G0082910	yes|down	yes|down	yes|down	3
ZX.01G0082920	no|up	no|down	yes|down	1
ZX.01G0082930	no|up	yes|up	no|up	1
ZX.01G0082970	no|down	yes|down	yes|down	2
ZX.01G0083030	yes|up	yes|up	yes|up	3
ZX.01G0083040	no|up	no|up	yes|up	1
ZX.01G0083060	no|up	yes|up	yes|up	2
ZX.01G0083100	yes|up	yes|up	yes|up	3
ZX.01G0083120	yes|up	yes|up	yes|up	3
ZX.01G0083160	yes|up	no|up	no|up	1
ZX.01G0083180	no|down	no|down	yes|down	1
ZX.01G0083200	yes|up	no|up	no|up	1
ZX.01G0083440	yes|up	yes|up	yes|up	3
ZX.01G0083450	no|up	no|up	yes|up	1
ZX.01G0083460	yes|down	yes|down	yes|down	3
ZX.01G0083510	no|up	yes|down	no|down	1
ZX.01G0083520	no|down	no|down	yes|down	1
ZX.01G0083580	yes|down	yes|down	yes|down	3
ZX.01G0083600	no|up	yes|up	no|up	1
ZX.01G0083620	yes|down	yes|down	yes|down	3
ZX.01G0083640	yes|up	no|down	no|down	1
ZX.01G0083840	no|up	yes|down	no|up	1
ZX.01G0083940	yes|up	no|up	no|up	1
ZX.01G0084400	no|up	yes|down	yes|down	2
ZX.01G0084650	no|up	no|up	yes|up	1
ZX.01G0084680	no|down	yes|down	yes|down	2
ZX.01G0084740	yes|up	yes|up	yes|up	3
ZX.01G0084820	no|down	yes|down	no|down	1
ZX.01G0084960	yes|up	no|up	no|up	1
ZX.01G0085050	yes|down	yes|down	yes|down	3
ZX.01G0085230	yes|up	yes|up	no|up	2
ZX.01G0085270	yes|up	no|up	no|up	1
ZX.01G0085320	no|down	yes|down	yes|down	2
ZX.01G0085480	yes|up	yes|up	yes|up	3
ZX.01G0085500	no|up	yes|up	yes|up	2
ZX.01G0085510	yes|up	no|down	no|down	1
ZX.01G0085700	yes|up	no|up	yes|up	2
ZX.01G0085720	no|up	yes|up	no|up	1
ZX.01G0085740	no|up	yes|up	yes|up	2
ZX.01G0085770	yes|up	yes|up	yes|up	3
ZX.01G0085780	no|down	yes|down	yes|down	2
ZX.01G0085960	yes|down	no|up	no|no test	1
ZX.01G0085970	yes|down	yes|down	yes|down	3
ZX.01G0085980	yes|down	yes|down	yes|down	3
ZX.01G0085990	yes|down	yes|down	yes|down	3
ZX.01G0086000	no|up	yes|up	no|up	1
ZX.01G0086030	yes|down	no|down	no|down	1
ZX.01G0086100	yes|up	no|down	no|up	1
ZX.01G0086110	no|up	no|up	yes|up	1
ZX.01G0086230	yes|up	yes|up	yes|up	3
ZX.01G0086270	yes|down	no|down	yes|down	2
ZX.01G0086360	no|up	yes|down	no|down	1
ZX.01G0086440	yes|down	yes|down	yes|down	3
ZX.01G0086600	yes|up	yes|up	no|up	2
ZX.01G0086610	no|up	yes|up	yes|up	2
ZX.01G0086640	yes|up	yes|up	no|up	2
ZX.01G0086700	no|down	no|up	yes|up	1
ZX.01G0086710	no|up	yes|up	no|up	1
ZX.01G0086750	no|down	yes|down	yes|down	2
ZX.01G0086760	no|down	yes|down	yes|down	2
ZX.01G0086800	no|up	yes|up	no|up	1
ZX.01G0086850	yes|down	yes|down	yes|down	3
ZX.01G0086950	no|up	yes|up	no|up	1
ZX.01G0086960	yes|up	yes|up	yes|up	3
ZX.01G0086980	no|up	yes|up	no|up	1
ZX.01G0087010	yes|up	no|down	no|up	1
ZX.01G0087090	no|down	yes|down	no|down	1
ZX.01G0087110	no|up	no|up	yes|up	1
ZX.01G0087250	no|down	yes|down	no|down	1
ZX.01G0087420	no|down	yes|down	yes|down	2
ZX.01G0087630	no|down	yes|down	no|down	1
ZX.01G0087680	no|up	yes|down	yes|down	2
ZX.01G0087710	no|down	no|down	yes|down	1
ZX.01G0087720	yes|down	yes|down	yes|down	3
ZX.01G0087760	no|down	yes|down	no|down	1
ZX.01G0087770	no|down	yes|down	no|down	1
ZX.01G0087960	no|down	yes|down	no|down	1
ZX.01G0088100	yes|up	no|down	yes|down	2
ZX.01G0088120	no|down	yes|down	no|down	1
ZX.01G0088270	yes|down	yes|down	yes|down	3
ZX.01G0088280	no|down	yes|down	yes|down	2
ZX.01G0088330	no|up	yes|up	yes|up	2
ZX.01G0088480	no|up	yes|up	no|up	1
ZX.01G0088540	yes|up	yes|up	no|up	2
ZX.01G0088680	yes|down	yes|down	no|down	2
ZX.01G0088710	no|down	yes|down	no|down	1
ZX.01G0088760	no|down	yes|down	no|down	1
ZX.01G0088770	yes|up	no|up	no|up	1
ZX.01G0088870	no|up	yes|down	yes|down	2
ZX.01G0088900	yes|down	yes|down	no|down	2
ZX.01G0088920	no|down	yes|down	yes|down	2
ZX.01G0088970	yes|down	no|down	no|down	1
ZX.01G0088980	no|up	yes|up	yes|up	2
ZX.01G0089020	yes|up	no|down	no|up	1
ZX.01G0089060	yes|down	yes|down	yes|down	3
ZX.01G0089100	yes|up	no|up	yes|up	2
ZX.01G0089130	no|down	yes|up	yes|up	2
ZX.01G0089250	yes|up	yes|up	yes|up	3
ZX.01G0089380	yes|up	no|up	no|up	1
ZX.01G0089480	no|down	yes|down	yes|down	2
ZX.01G0089520	yes|down	no|down	no|up	1
ZX.01G0089600	no|down	yes|down	yes|down	2
ZX.01G0089610	yes|down	yes|down	yes|down	3
ZX.01G0089670	no|up	no|up	yes|up	1
ZX.01G0089880	yes|up	yes|up	yes|up	3
ZX.01G0089990	no|up	yes|up	no|up	1
ZX.01G0090000	no|down	yes|up	no|up	1
ZX.01G0090290	no|up	yes|up	yes|up	2
ZX.01G0090430	yes|up	yes|up	no|up	2
ZX.01G0090510	yes|down	no|down	no|up	1
ZX.01G0090620	no|up	yes|up	yes|up	2
ZX.01G0090650	yes|up	no|up	no|up	1
ZX.01G0090750	yes|up	yes|up	yes|up	3
ZX.01G0090880	no|up	no|up	yes|up	1
ZX.01G0090890	yes|down	yes|down	yes|down	3
ZX.01G0090940	no|up	yes|up	yes|up	2
ZX.01G0091040	no|down	yes|up	yes|up	2
ZX.01G0091060	no|up	yes|up	yes|up	2
ZX.01G0091070	no|down	yes|up	yes|up	2
ZX.01G0091090	no|up	yes|down	no|down	1
ZX.01G0091190	yes|down	yes|down	yes|down	3
ZX.01G0091230	yes|up	no|up	no|up	1
ZX.01G0091310	no|up	yes|up	yes|up	2
ZX.01G0091320	yes|up	no|up	no|up	1
ZX.01G0091330	no|up	yes|up	no|up	1
ZX.01G0091440	no|down	yes|up	no|down	1
ZX.01G0091530	no|up	yes|up	no|up	1
ZX.01G0091540	no|up	yes|up	no|up	1
ZX.01G0091550	yes|down	yes|down	yes|down	3
ZX.01G0091570	yes|down	yes|down	yes|down	3
ZX.01G0092040	no|down	yes|down	no|down	1
ZX.01G0092140	no|up	no|up	yes|up	1
ZX.01G0092200	yes|down	no|down	no|up	1
ZX.01G0092250	yes|up	no|up	no|up	1
ZX.01G0092300	no|down	yes|down	no|down	1
ZX.01G0092970	yes|up	yes|up	yes|up	3
ZX.01G0093100	yes|down	yes|down	yes|down	3
ZX.01G0093150	no|down	no|down	yes|down	1
ZX.01G0093170	no|down	yes|down	yes|down	2
ZX.01G0093310	no|down	yes|down	yes|down	2
ZX.01G0093360	no|up	yes|up	yes|up	2
ZX.01G0093510	no|up	yes|up	yes|up	2
ZX.01G0093520	no|up	yes|up	yes|up	2
ZX.01G0093580	yes|up	yes|up	yes|up	3
ZX.01G0093590	yes|up	yes|up	no|up	2
ZX.01G0093670	no|down	yes|up	no|up	1
ZX.01G0093690	no|down	yes|down	yes|down	2
ZX.01G0093730	yes|up	yes|up	yes|up	3
ZX.01G0094100	yes|up	yes|up	yes|up	3
ZX.01G0094230	no|up	yes|up	yes|up	2
ZX.01G0094270	yes|down	no|up	no|up	1
ZX.01G0094310	no|no test	yes|down	no|down	1
ZX.01G0094460	no|down	yes|down	yes|down	2
ZX.01G0094550	no|down	yes|down	no|down	1
ZX.01G0094680	yes|up	yes|up	yes|up	3
ZX.01G0094730	no|down	yes|down	yes|down	2
ZX.01G0094770	no|up	no|up	yes|up	1
ZX.01G0094870	no|down	yes|down	no|down	1
ZX.01G0094880	yes|down	no|down	no|down	1
ZX.01G0094930	no|down	yes|up	no|up	1
ZX.01G0094970	no|up	yes|up	no|up	1
ZX.01G0095120	no|down	yes|down	yes|down	2
ZX.01G0095160	no|down	yes|down	no|down	1
ZX.01G0095180	no|up	yes|down	no|down	1
ZX.01G0095190	no|down	yes|down	no|down	1
ZX.01G0095210	yes|up	no|down	no|up	1
ZX.01G0095220	yes|up	no|down	no|up	1
ZX.01G0095290	no|down	yes|down	yes|down	2
ZX.01G0095300	no|up	yes|up	yes|up	2
ZX.01G0095460	yes|down	yes|down	no|down	2
[truncated: 4,803 more rows]
